# Supplementary material for: 1,2-Diphenylethylenediamine linked chiral Ti(iv) complex—a new entry to the highly enantioselective silylcyanation of aliphatic and aromatic aldehydesElectronic supplementary information (ESI) available: experimental section. See http://www.rsc.org/suppdata/cc/b1/b107867d/
Source: Royal Society of Chemistry journal article supplement (doi:10.1039/b107867d), 2001-12-13
Supplement: b107867d.doc [file b107867d.doc]

## Supporting information

# 1,2-Diphenylethylenediamine linked chiral Ti(IV) complex -

**a new entry to the highly enantioselective silylcyanation of aliphatic and aromatic aldehydes**

Chun-Wei Chang, Chun-Tzu Yang, Chyuan-Der Hwang, and Biing-Jiun Uang*

Department of Chemistry, National Tsing Hua University,

Hsinchu, Taiwan 300, R.O.C.

(Total 17 pages including this page)

**Experimental Section**

**General**: All melting points were uncorrected. 1H and 13C NMR were measured on Varian GEMINI-300, Varian UNITY-400 and Bruker AC-300 MHz NMR spectrometer. HPLC analysis were performed on HITACHI L-6200 chromatography with L-4200 UV detector and Waters 410 RI detector. Chiracel OD column was purchased from Daicel Chemical Industries, LTD. Optical rotations were measured with a DIP-1000 polarimeter.

**Materials**:CH2Cl2 was distilled from CaH2. THF was distilled from potassium. Ti(O*i*Pr)4 and TMSCN were purchased from Aldrich.

**Compound 4**:Ketopinic acid chloride **3** (20.1 g, 100 mmol) in CH2Cl2 (200 mL) was added to a stirred solution of triethylamine (7.2 g, 100 mmol) and corresponding diamine (50 mmol) in CH2Cl2 (50 mL) at 0 oC over 1 h period. The reaction was then allowed to warm to room temperature and then stirred for an additional 1 h period. The reaction was then quenched by pouring into water (100 mL) and extracted with dichloromethane (2 x 200 mL). The organic phase was washed with brine (2 x 200 mL), dried (Na2SO4) and concentrated. The residue was purified by passing through silica column eluting with ethyl acetate/hexane (1:3 for **4a** and 1:2 for **4b**) to provide **4** as a white solid.

### 4a: yield 2.37 g, 93%, mp=243.5-244.3 oC; []D24 +39.9 (*c* 1.46, CHCl3); IR (KBr) 3346, 1740, 1664, 1649 cm-1; 1H NMR (400 MHz, CDCl3)  8.41 (d, *J*=6.8Hz, 2H), 7.19-7.12 (m, 6H), 7.08-7.05 (m, 4H), 5.41 (dd, *J*=2.0Hz, 6.0Hz, 2H), 2.51-2.36 (m, 4H), 2.08-1.92 (m, 6H), 1.55-1.48 (m, 2H), 1.35-1.34 (m, 2H), 1.11 (s, 6H), 0.83 (s, 6H); 13C NMR (100 MHz, CDCl3)  216.9 (C), 168.8 (C), 138.8 (C), 127.9 (2CH), 127.1 (3CH), 64.3 (C), 57.2 (CH), 49.9 (C), 43.5 (CH2), 43.1 (CH), 28.3 (CH2), 27.5 (CH2), 20.6 (CH3), 20.1 (CH3); HRMS (M+) cacld for C34H41O4N2: 541.2988(M+1), found 541.3066.

**4b**: yield 20.8 g, 95.3%, mp=136.3-136.8 oC; []D26 +29.0 (*c* 1.0, CHCl3); IR (KBr) 3282, 2968, 1730, 1683, 1603 cm-1; 1H NMR (300 MHz, CDCl3):  9.43 (m, 2H), 7.72-7.69 (m, 2H), 7.15-7.12 (m, 2H), 2.65-2.50 (m, 4H), 2.18-2.07 (m, 4H), 2.02 (s, 1H), 1.96 (s, 1H), 1.83-1.74 (m, 2H), 1.49-1.40 (m, 2H), 1.28 (s, 6H), 1.07 (s, 6H); 13C NMR (75 MHz, CDCl3):  185.0 (C), 168.2 (C), 129.9 (C), 125.6 (CH), 124.8 (CH), 65.2 (C), 50.4 (C), 43.7 (CH2), 43.4 (CH), 28.8 (CH2), 27.7 (CH2), 20.9 (CH3), 20.5 (CH3); HRMS (M+) cacld for C26H32 N2O4: 436.2362, found 436.2358;

**Compound 2**:To a solution of **4** (4 mmol) in THF (5 mL) at -78 oC was added 1N L-selectride® in THF (18.0 mL) dropwise. The reaction mixture was stirred at -78 oC for 1 h followed by further stirring for 2 h at room temperature, then cooled to 0 oC and quenched by the successive addition of H2O (4.0 mL), EtOH (12 mL), 3 *N* aq. NaOH (16 mL), followed by the dropwise addition of 30% aq. H2O2 (12 mL) over a 30 min period. The aqueous phase was saturated with K2CO3 and extracted with CH2Cl2. The organic phase was dried with Na2SO4, and filtered. Evaporation of solvent followed by crystallization (EA/Hexane=1/5) afforded compound **2**.

**2a**: yield 95%, mp=259.7-260.5 oC; []D24 -222.8 (*c* 1.00, CHCl3); IR (KBr) 3366, 2936, 1642, 1545, 697 cm-1; 1H NMR (400 MHz, CDCl3)  7.86 (d, *J*=7.2Hz, 2H), 7.17-7.12 (m, 6H), 7.03-7.00 (m, 4H), 5.40-5.38 (m, 2H), 5.27 (dd, *J*=7.2Hz, 2.6Hz, 2H), 3.89-3.86 (m, 2H), 2.49-2.38 (m, 2H), 1.97-1.84 (m, 4H), 1.75-1.68 (m, 4H), 1.10-1.02 (m, 4H), 0.94 (s, 6H), 0.78 (s, 6H); 13C NMR (100 MHz, CDCl3)  73.5 (C), 137.9 (C), 128.4 (2CH), 127.5 (CH), 126.9 (2CH), 77.2 (CH), 59.2 (CH), 58.3 (C), 49.9 (C), 45.2 (CH), 40.9 (CH2), 28.8 (CH2), 26.3 (CH2), 20.6 (CH3), 20.5 (CH3); HRMS cacld for C34H44O4N2: 544.3301, found 544.3301.

**2b**: yield 96%, mp=121.1-121.3 oC; []D26 +4.68 (*c* 0.52, CHCl3); IR (KBr) 3422, 2940, 1659, 1596 cm-1; 1H NMR (400 MHz, CDCl3)  9.09 (s, 2H), 7.45-7.42 (m, 2H), 7.21-7.19 (m, 2H), 4.49 (br, 2H), 4.08-4.06 (m, 2H), 2.35-2.28 (m, 2H), 2.03-1.80 (m, 8H), 1.28 (s, 6H), 1.26-1.22 (m, 2H), 1.14-1.08 (m, 2H), 1.04 (s, 6H); 13C NMR (100 MHz, CDCl3)  173.5 (C), 130.5 (C), 126.0 (CH), 125.6 (CH), 77.3 (CH), 58.0 (C), 50.5 (C), 45.6 (CH), 41.7 (CH2), 30.0 (CH2), 27.2 (CH2), 21.5 (CH3), 20.7 (CH3); HRMS cacld for C26H36N2O4: 440.2675, found 440.2666.

**General procedure for enantioselective trimethylsilylcyanation of aldehydes**: To a stirred solution of compound **2a** (0.180 g, 0.33 mmol) and 4Å molecular sieve (powder, 130 mg) in dichloromethane (5 mL) was added titanium tetraisopropoxide (0.09 mL, 0.3 mmol) under Ar at room temperature and stirred for 1h. Trimethylsilyl cyanide (0.45 mL, 3.5 mmol) was added to the reaction mixture and stirred for additional 0.5 h. Then, the reaction mixture was cooled to -78 oC and aldehyde (2 mmol) was added to the reaction mixture. The disappearance of the aldehyde was monitored by thin layer chromatography (ethyl acetate/hexane = 1/5). The reaction mixture was quenched with 1 *N* HCl (20 mL), stirred vigorously at room temperature for 6 h. The reaction mixture was filtered and filtrate was extracted with dichloromethane (5 x 5 mL). The combined organic extracts were washed with brine and dried over anhydrous MgSO4, then concentrated *in vacuo*. The residue was distilled under reduced pressure (100 oC/0.3 mmHg) to afford the corresponding (*S*)-cyanohydrin. Compound **2a** was recovered in 80-92% yield through column purification of the remaining residue. The enantiomeric excess of the cyanohydrin was determined by HPLC with Chiracel OD column [*i*PrOH/Hexane (0.25/100), 1 mL/min] after protected as TBDMS ether.

**Determination of Enantiomeric Excess (e.e.) of the Cyanohydrin**:

**Method A** (for 2-hydroxy-2-phenylacetonitrile, **5a**):The e.e. of the cyanohydrin was determined by HPLC analysis of the corresponding TBDMS ether (detected by UV detector at 254 nm). The required TBDMS ether was prepared by the following procedure1: To a CH2Cl2 (2 mL) solution of cyanohydrin (10 mg) was added TBDMSOTf (30 L) and 2,6-lutidine (30 L) at 0 oC. The mixture was stirred at room temperature for 1 h, poured into water (5 mL) and extracted with CH2Cl2 (2x5 mL). The combined extracts were washed with brine (2x5 mL), dried over anhydrous Na2SO4 and concentrated. The residue was purified by chromatographic separation on silica gel column [ethyl acetate/hexane (1/30)] to afford the corresponding TBDMS ether.

**Method B** (for other cyanohydrins, **5b-i**): The e.e. for the other cyanohydrins was determined by HPLC analysis of the corresponding cyanohydrin acetyl ester (detected by UV detector at 254 nm for **5d-i** and RI detector for **5b-c**) prepared by the following procedure2: To a CHCl3 (2 mL) solution of cyanohydrin (10 mg) was added acetyl chloride (0.5 mL) and pyridine (0.1 mL) at 23 oC. The mixture was stirred at 23 oC for 1 h after which it was poured into water (5 mL) and extracted with chloroform (2x5 mL). The combined extracts were washed with brine (2x10 mL), dried over anhydrous Na2SO4 and concentrated. The residue was purified on silica gel column [ethyl acetate/hexane (1/30)] to afford the corresponding cyanohydrin acetyl ester.

**2-Hydroxy-2-phenylacetonitrile (5a)**:Crude was purified by bulb-to-bulb distillation (100 oC/0.3 mmHg) to give *S*-enriched product (87%). IR (neat) 3430, 2260, 1700, 1600 cm-1; 1H NMR (400 MHz, CDCl3)  2.90 (brs, 1H), 5.55 (s, 1H), 7.4-7.6 (m, 5H). The product was determined as 93% e.e. by HPLC analysis of its *tert*-butyl dimethylsilylether; The tR of *R*-isomer is 6.12 min and that of *S* isomer is 8.02 min [hexane/isopropanol (100/0.25), 1.0 mL/min].

**2-Cyclohexyl-2-hydroxyacetonitrile (5b)**:Crude product was purified by bulb-to-bulb distillation (120 oC/0.6 mmHg) to give *S*-enriched product (90%). IR (neat) 3450, 2250, 1710 cm-1; 1H NMR (400 MHz, CDCl3)  1.0-1.40 (m, 5H), 1.60-2.0 (m, 6H), 2.80 (brs, 1H), 4.27 (d, *J*=6.1Hz, 1H). The product was determined as >99% e.e. by HPLC analysis of its acetyl ester; The tR of *S*-isomer is 7.32 min and that of *R*-isomer is 6.62 min [hexane/isopropanol (60/1), 1.0 mL/min].

**2-Hydroxyhexanenitrile (5c)**:Crude product was purified by bulb-to-bulb distillation (80 oC/0.6 mmHg) to give *S*-enriched product(92%). IR 3430, 2250, 1630 cm-1; 1H NMR (400 MHz, CDCl3)  0.91 (t, *J*=6.0Hz, 3H), 1.32-1.51 (m, 4H), 1.78-1.86 (m, 2H), 2.92 (brs, 1H), 4.45 (t, *J*=6.0Hz, 1H); 13C NMR (400 MHz, CDCl3)  13.6 (CH3), 21.9 (CH2), 26.5 (CH2), 34.6 (CH2), 61.0 (CH), 120.2 (C); HRMS (M+) cacld for C6H11NO:113.0841, found 113.0837. The product was determined as 97% e.e. by HPLC analysis of its acetyl ester. The tR of *S*-isomer is 7.09 min and that of *R*-isomer is 6.45 min [hexane/isopropanol (60/1), 1.0 mL/min].

**2-Hydroxy-2-(2-methylphenyl)acetonitrile (5d)**:Crude product was purified by column chromatography (ethyl acetate/acetonitrile /hexane=2/1/6) to give *S*-enriched product[56% (80% for conversion yield)]. IR (neat) 3400, 3070, 2250 cm-1; 1H NMR (400 MHz, CDCl3)  2.43 (s, 3H), 2.80 (brs, 1H), 5.65 (s, 1H), 7.21-7.32 (m, 3H), 7.59 (d, *J*=6Hz, 1H). The product was determined as 94% e.e. by HPLC analysis of its acetyl ester. The tR of *S*-isomer is 19.14 min and that of *R*-isomer is 21.64 min [hexane/ethyl acetate (60/1), 1.0 mL/min].

**2-Hydroxy-2-(3-phenoxyphenyl)acetonitrile (5e)**:Crude product was purified by column chromatography (ethyl acetate/acetonitrile/ hexane = 2/1/6) to give *S*-enriched product [54% (78% for conversion yield)]. IR (neat) 3430, 3070, 2250, 1690, 1590 cm-1; 1H NMR (400 MHz, CDCl3)  3.6 (brs, 1H), 5.47 (s, 1H), 7.0-7.4 (m, 9H). The product was determined as 95% e.e. by HPLC analysis of its acetyl ester. The tR of *S*-isomer is 18.26 min and that of *R*-isomer is 26.12 min [hexane/isopropanol (97.5/2.5), 1.0 mL/min].

**2-Hydroxy-2-(4-methoxyphenyl)acetonitrile (5f)**:Crude product was purified by column chromatography (ethyl acetate/acetonitrile/ hexane = 2/1/6) to give *S*-enriched product[47% (72% for conversion yield)]. IR (neat) 3430, 3010, 2250, 1710, 1610 cm-1; 1H NMR (300 MHz, CDCl3)  2.7 (brs, 1H), 3.84 (s, 3H), 5.49 (s, 1H), 6.96 (d, *J*=8.5 Hz, 2H), 7.46 (d, *J*=8.5Hz, 2H). The product was determined as 99% e.e. by HPLC analysis of its acetyl ester. The tR of *S*-isomer is 12.12 min and that of *R*-isomer is 10.66 min [hexane/isopropanol (95/5), 1.0 mL/min].

**2-Hydroxy-2-naphthylacetonitrile (5g)**:Crude product was purified by column chromatography (ethyl acetate/acetonitrile/hexane=2/1/6) to give *S*-enriched product[67% (78% for conversion yield)]. IR (neat) 3480, 3060, 2250 cm-1; 1H NMR (400 MHz, CDCl3)  3.01 (brs, 1H), 5.70 (s, 1H), 7.50-7.60 (m, 3H), 7.80-8.00 (m, 3H), 8.05 (s, 1H). The product was determined as 99% e.e. by HPLC analysis of its acetyl ester. The tR of *S*-isomer is 12.32 min and that of *R*-isomer is 14.62 min [hexane/isopropanol/acetonitrile (40/1/1), 1.0 mL/min].

**(*E*)-2-Hydroxy-4-phenyl-3-butenenitrile (5h)**:Crude product was purified by column chromatography (ethyl acetate/acetonitrile/hexane= 2/1/6) to give *S*-enriched product [49% (74% for conversion yield)]. IR (neat) 3370, 3030, 2250 cm-1; 1H NMR (300 MHz, CDCl3)  2.7 (brs, 1H), 5.16 (dd, *J*=5.7, 1.1Hz, 1H), 6.25 (dd, *J*=15.8, 5.7Hz, 1H), 6.93 (dd, *J*=15.8, 1.1Hz, 1H), 7.3-7.5 (m, 5H). The product was determined as 97% e.e. by HPLC analysis of its acetyl ester. The tR of *S*-isomer is 14.56 min and that of *R*-isomer is 18.79 min [hexane/isopropanol/acetonitrile (40/1/1), 1.0 mL/min].

**2-Hydroxy-4-phenylbutanenitrile (5i)**: Crude product was purified by column chromatography (ethyl acetate/acetonitrile/hexane=2/1/6) to give *S*-enriched product [61% (73% for conversion yield)]. IR (neat) 3430, 3050, 2250, 1720, 1610 cm-1; 1H NMR (400 MHz, CDCl3)  2.0-2.20 (m, 2H), 2.80-2.90 (m, 2H), 4.10 (brs, 1H), 4.43 (t, *J*=6.7Hz, 1H), 7.20-7.40 (m, 5H). The product was determined as 97% e.e. by HPLC analysis of its acetyl ester. The tR of *S*-isomer is 13.18 min and that of *R*-isomer is 17.36 min [hexane/isopropanol/acetonitrile (40/1/1), 1.0 mL/min].

**References:**

1. Y. Z. Jiang, L. Z. Gong, X. M. Feng, W. H. Hu, W. D. Pan, Z. Li, A. Q. Mi, *Tetrahedron* 1997, **53**, 14327.
2. E. J. Corey, H. Cho, D. H. Hua, C. Rucker, *Tetrahedron Lett.* 1981,**22**, 3455.

Racemic Product


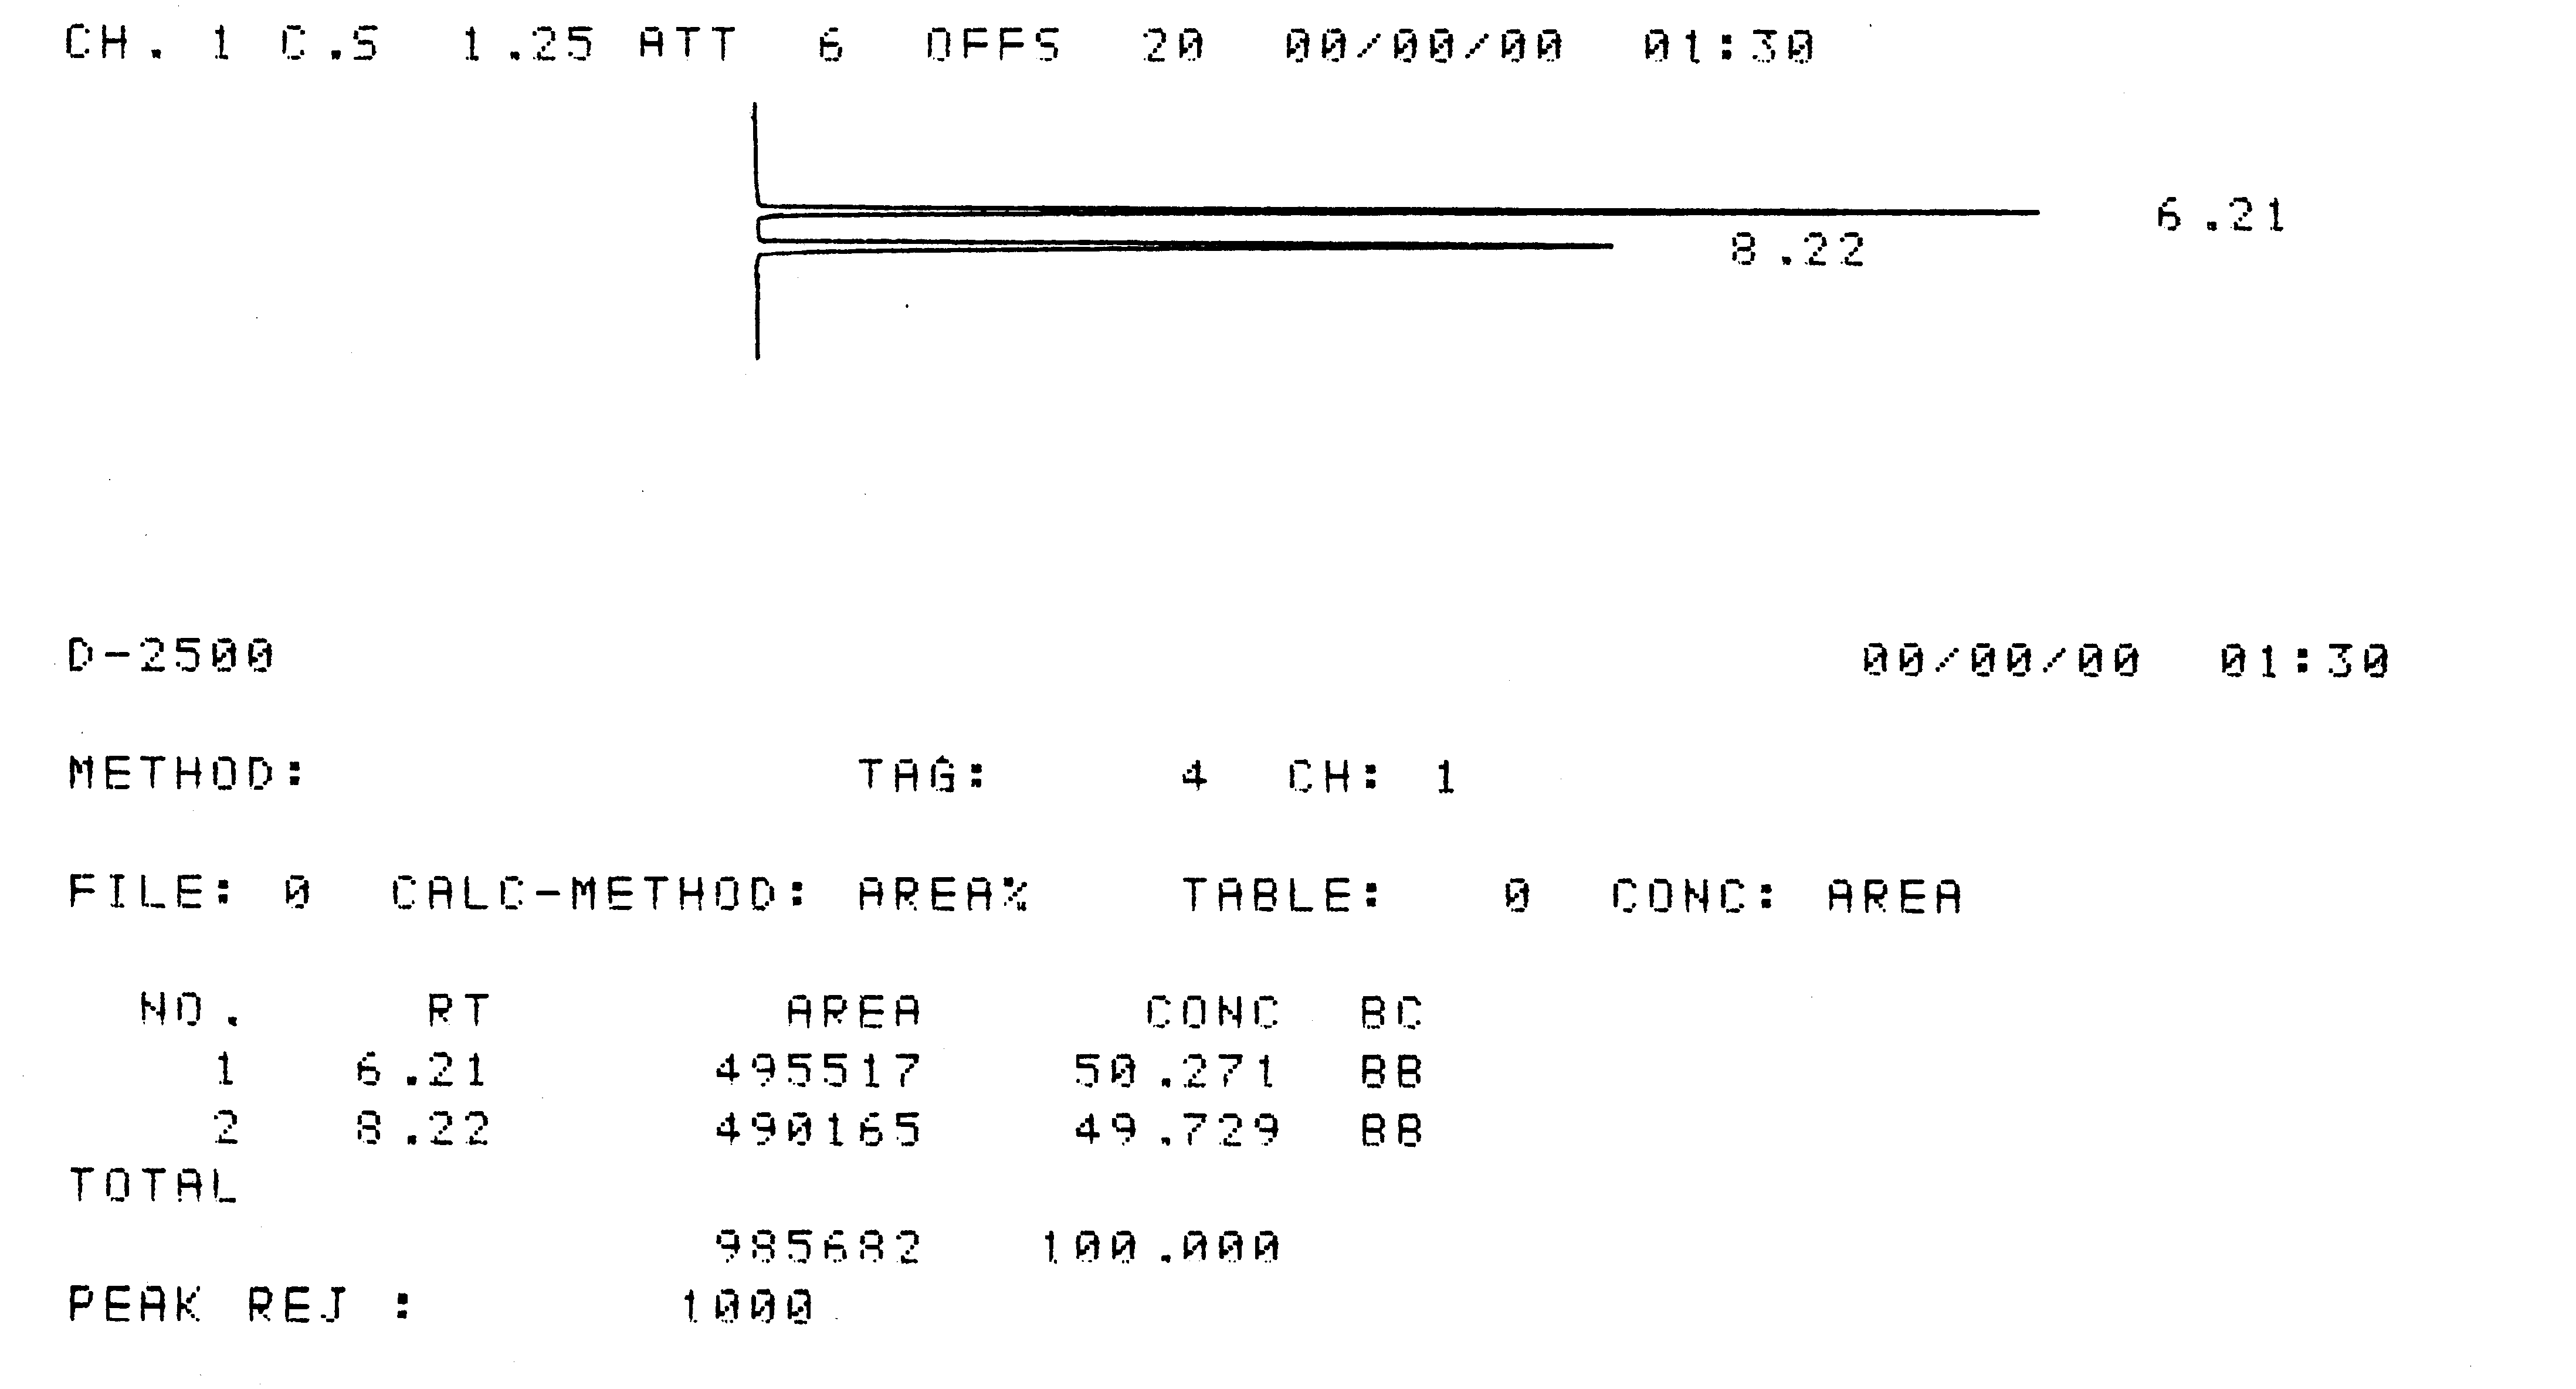


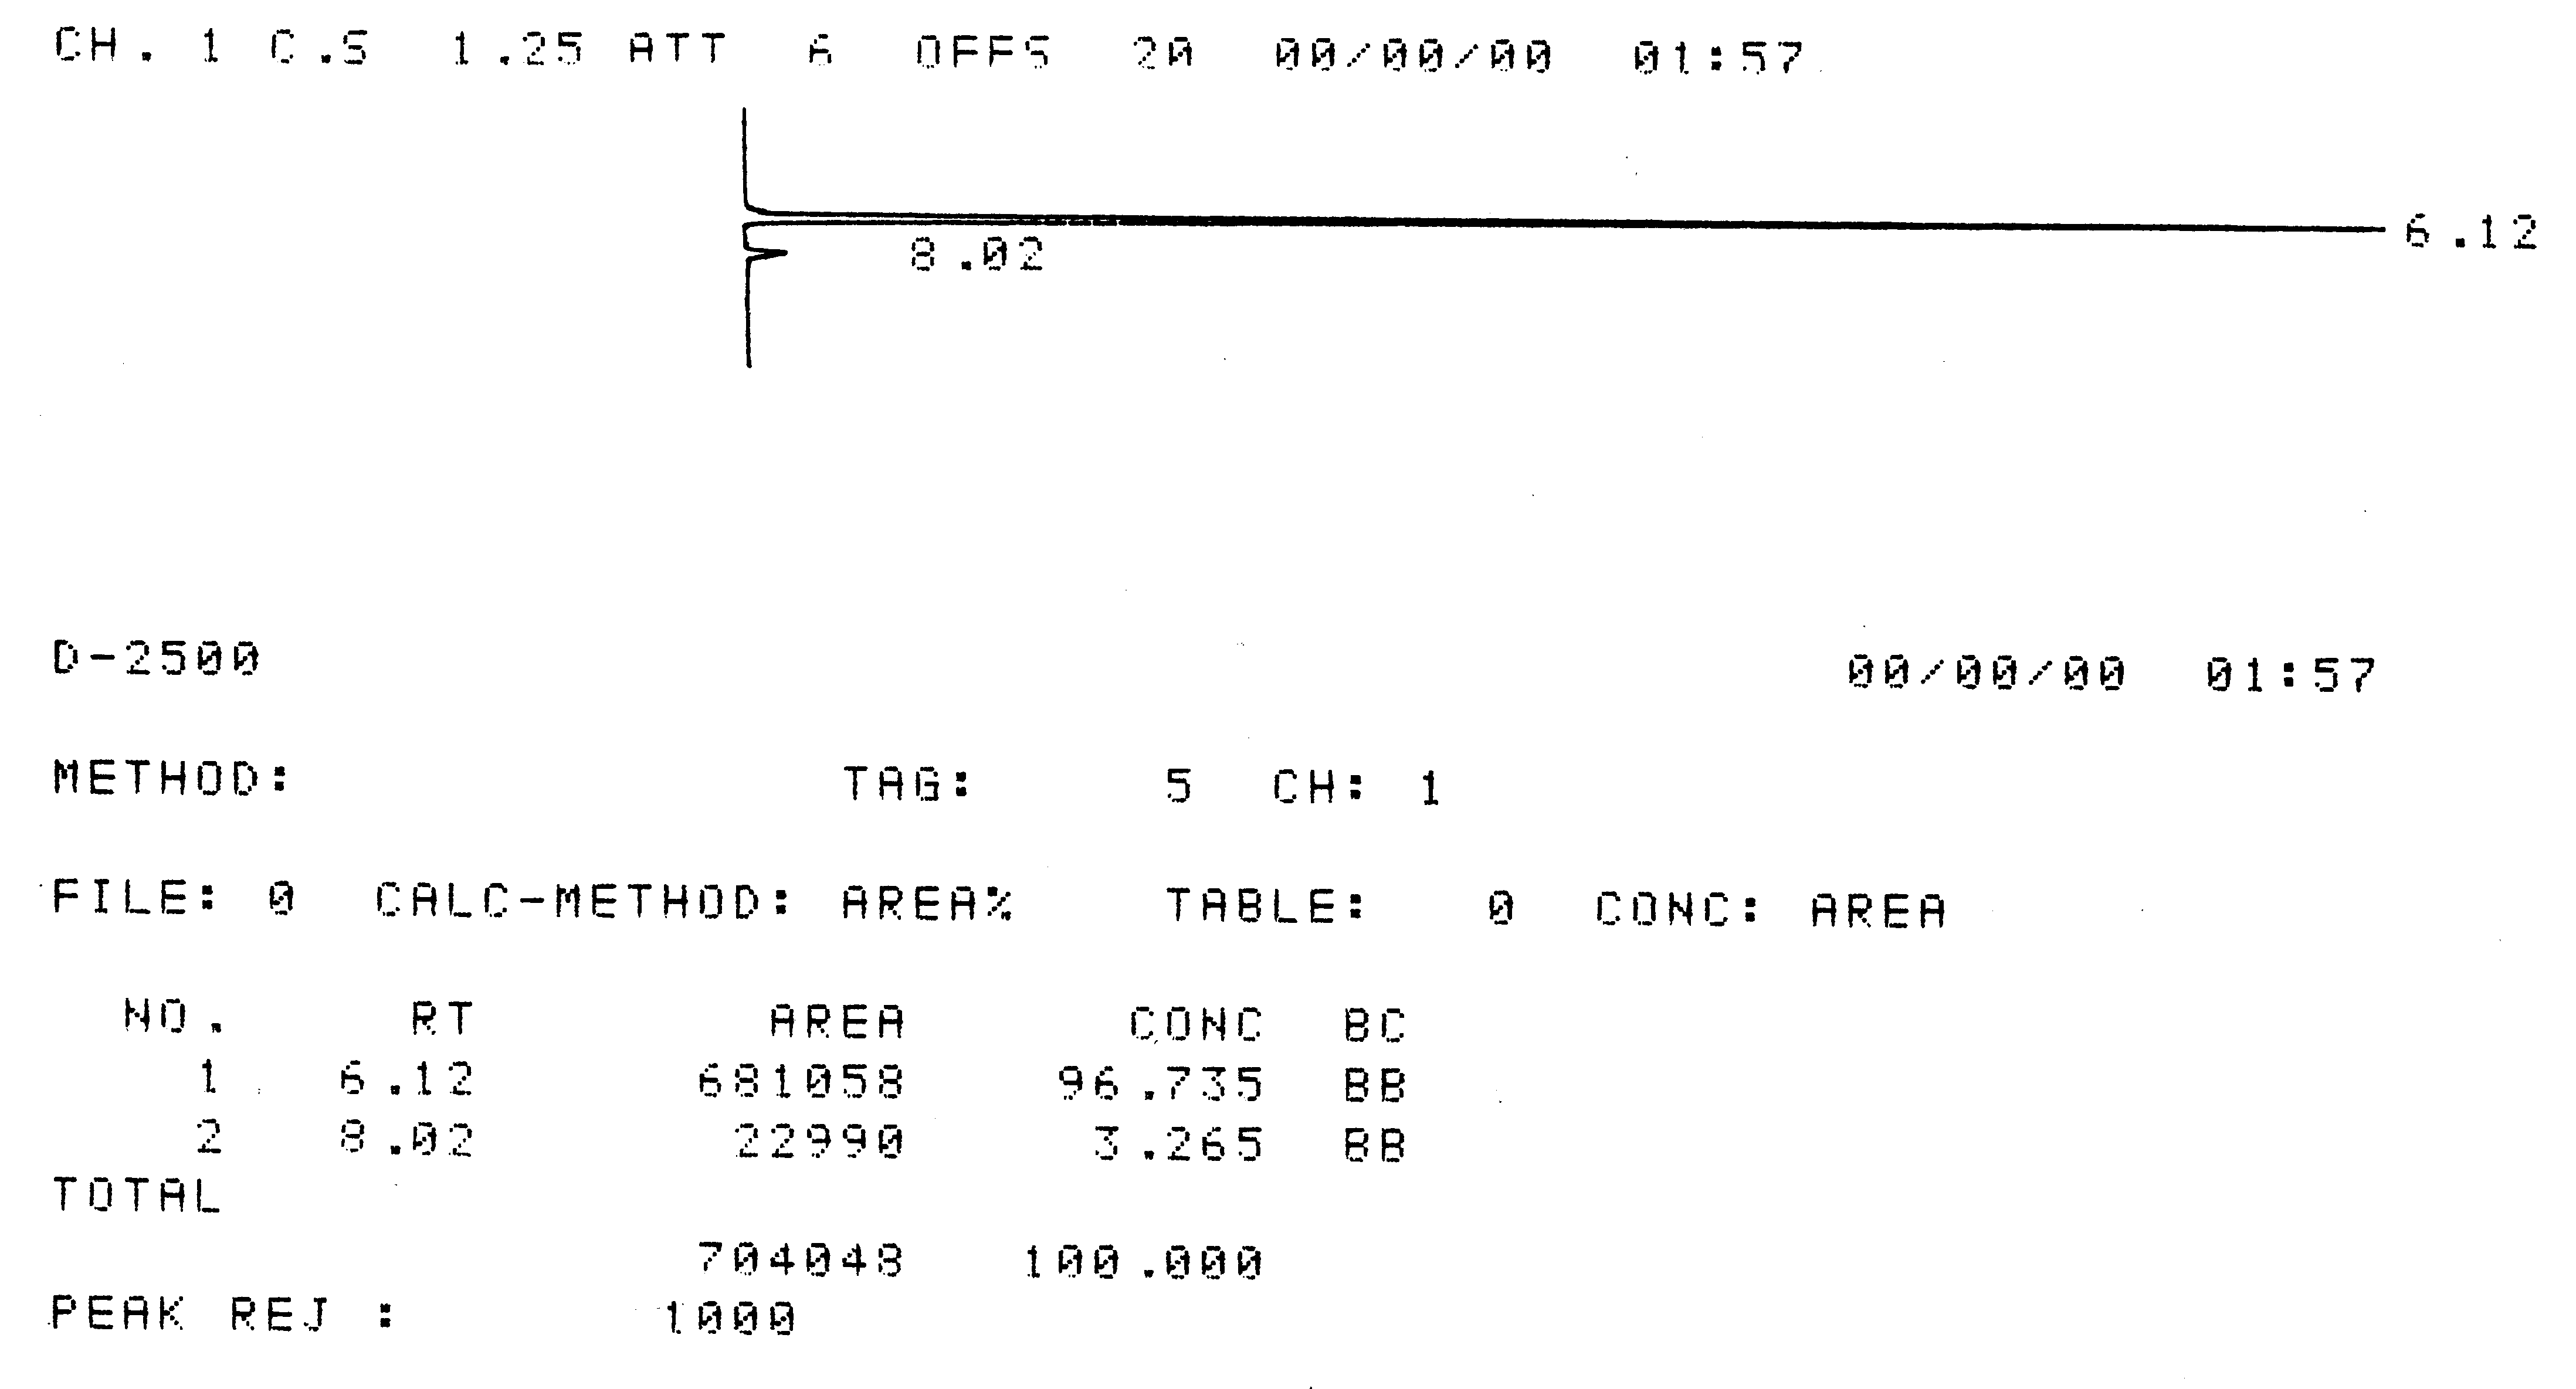


Reaction Product

Detector: UV, 254nm

Column: Chiracel OD

Eluent: *n*-Hexane/2-Propanol = 100/0.25

Rate: 1mL/min

Racemic Product


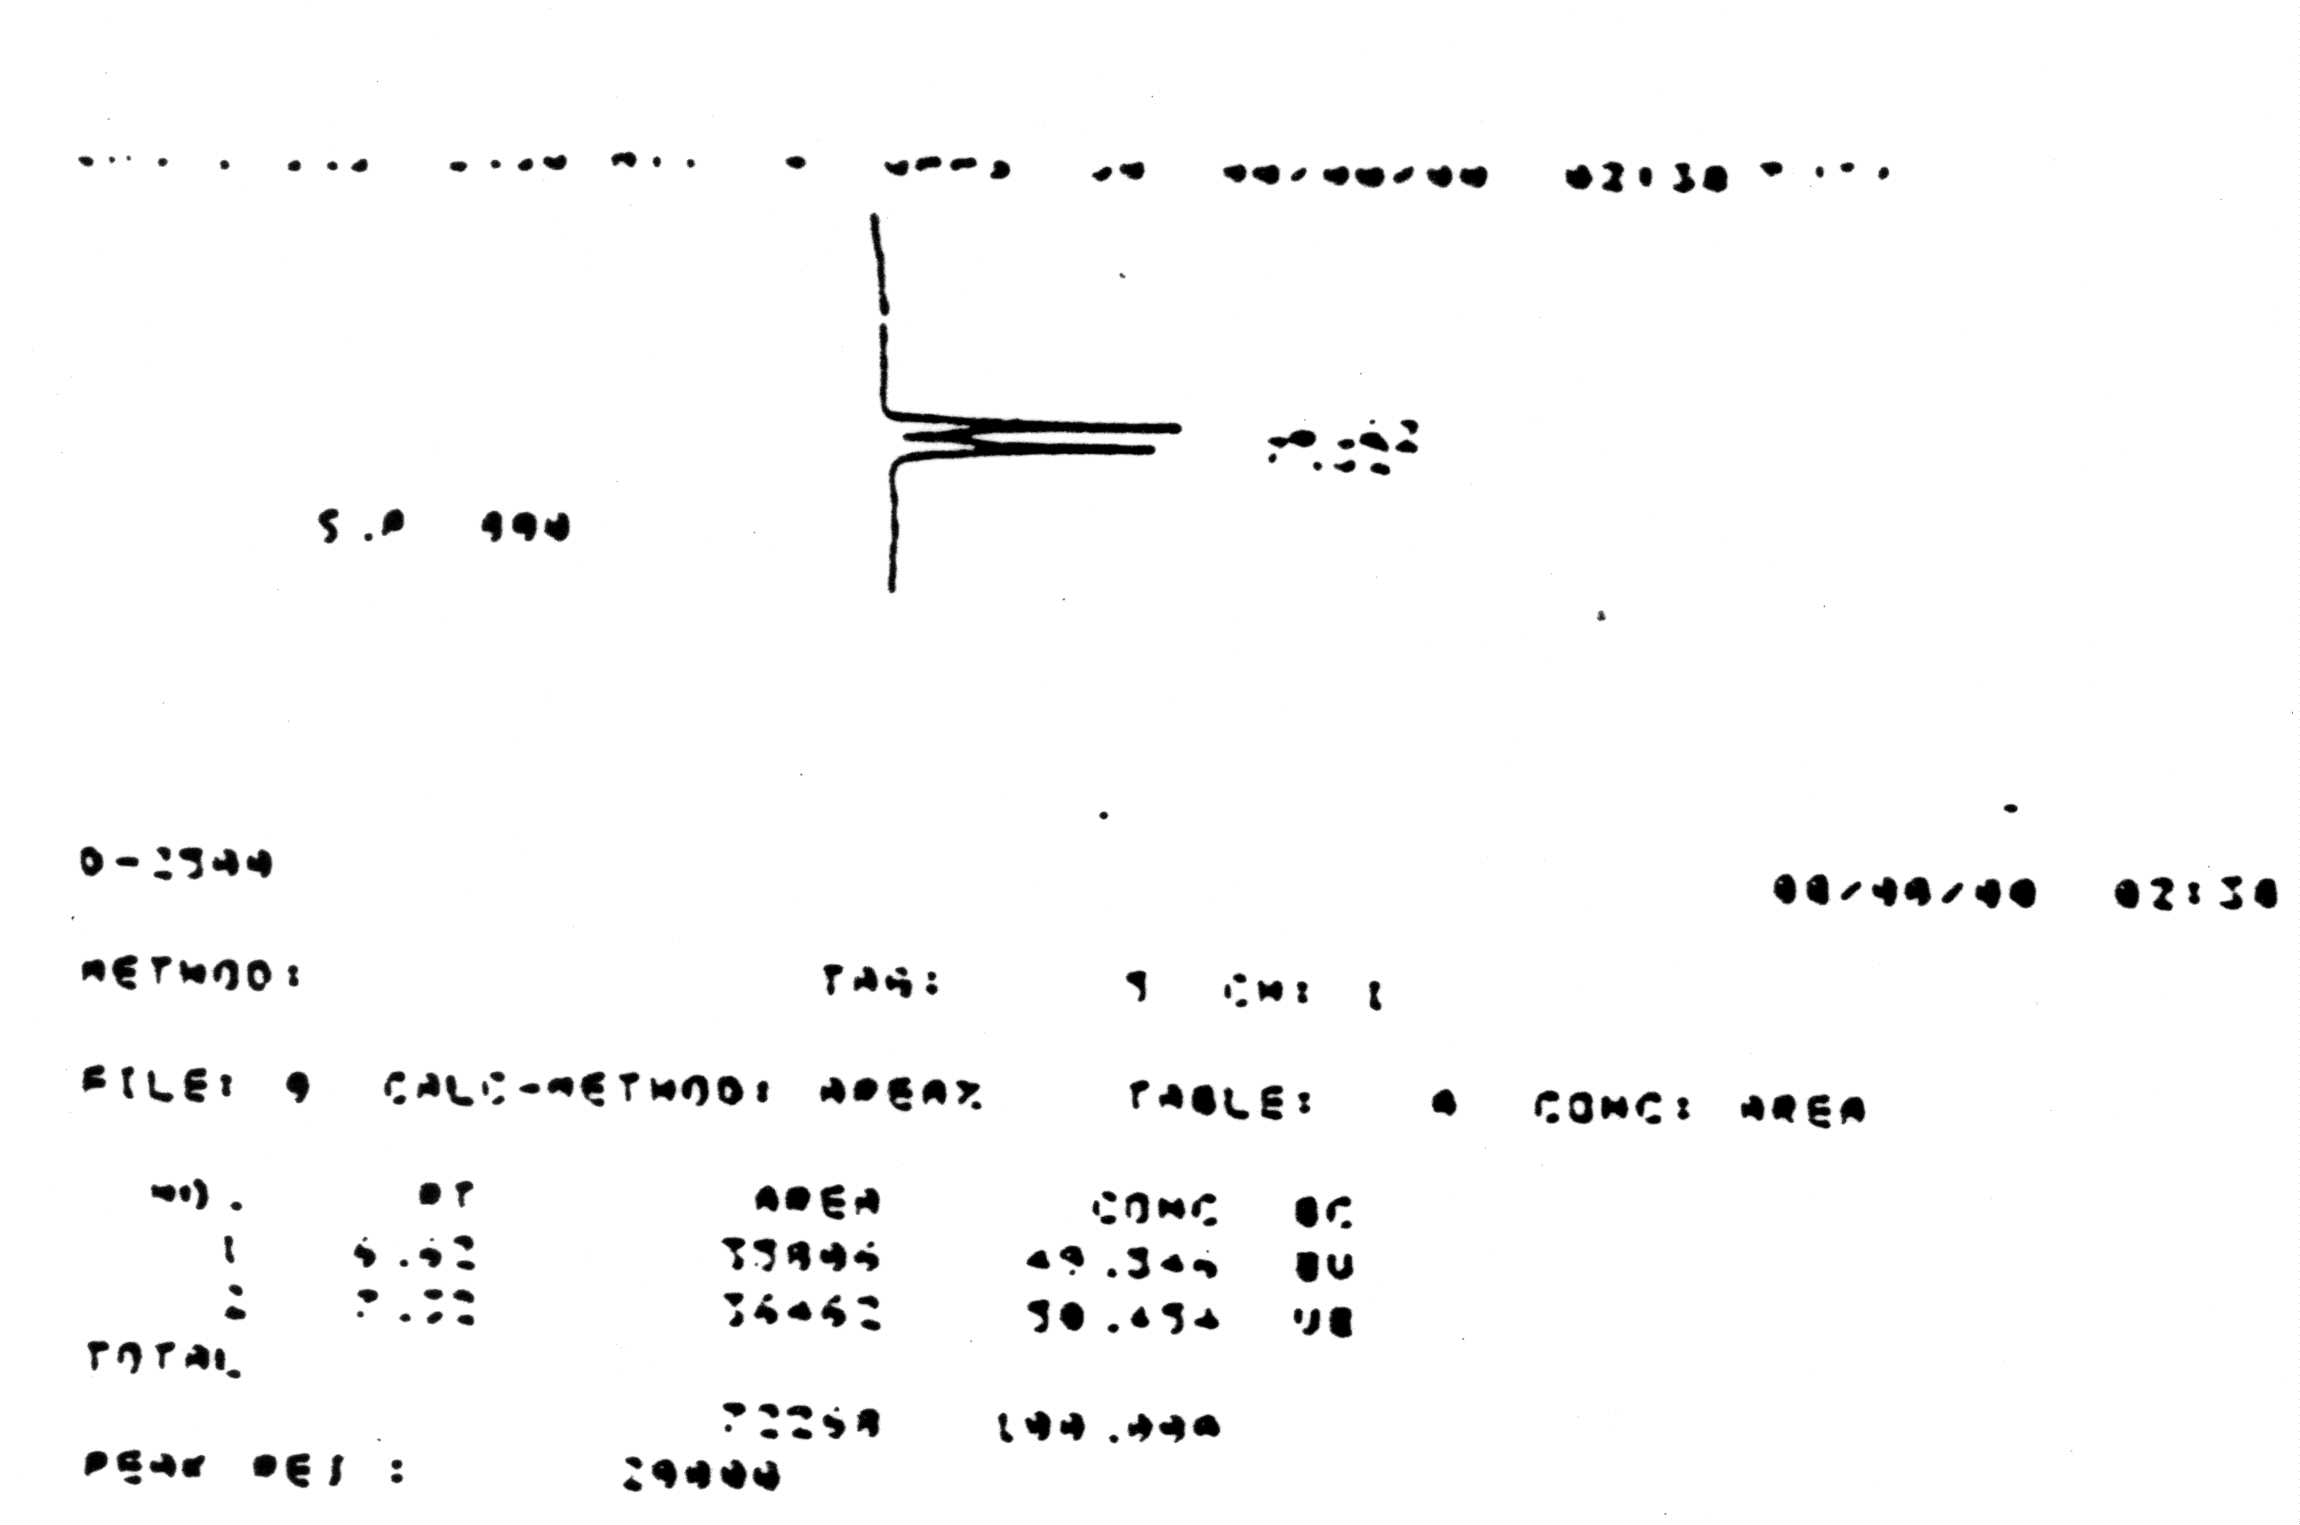


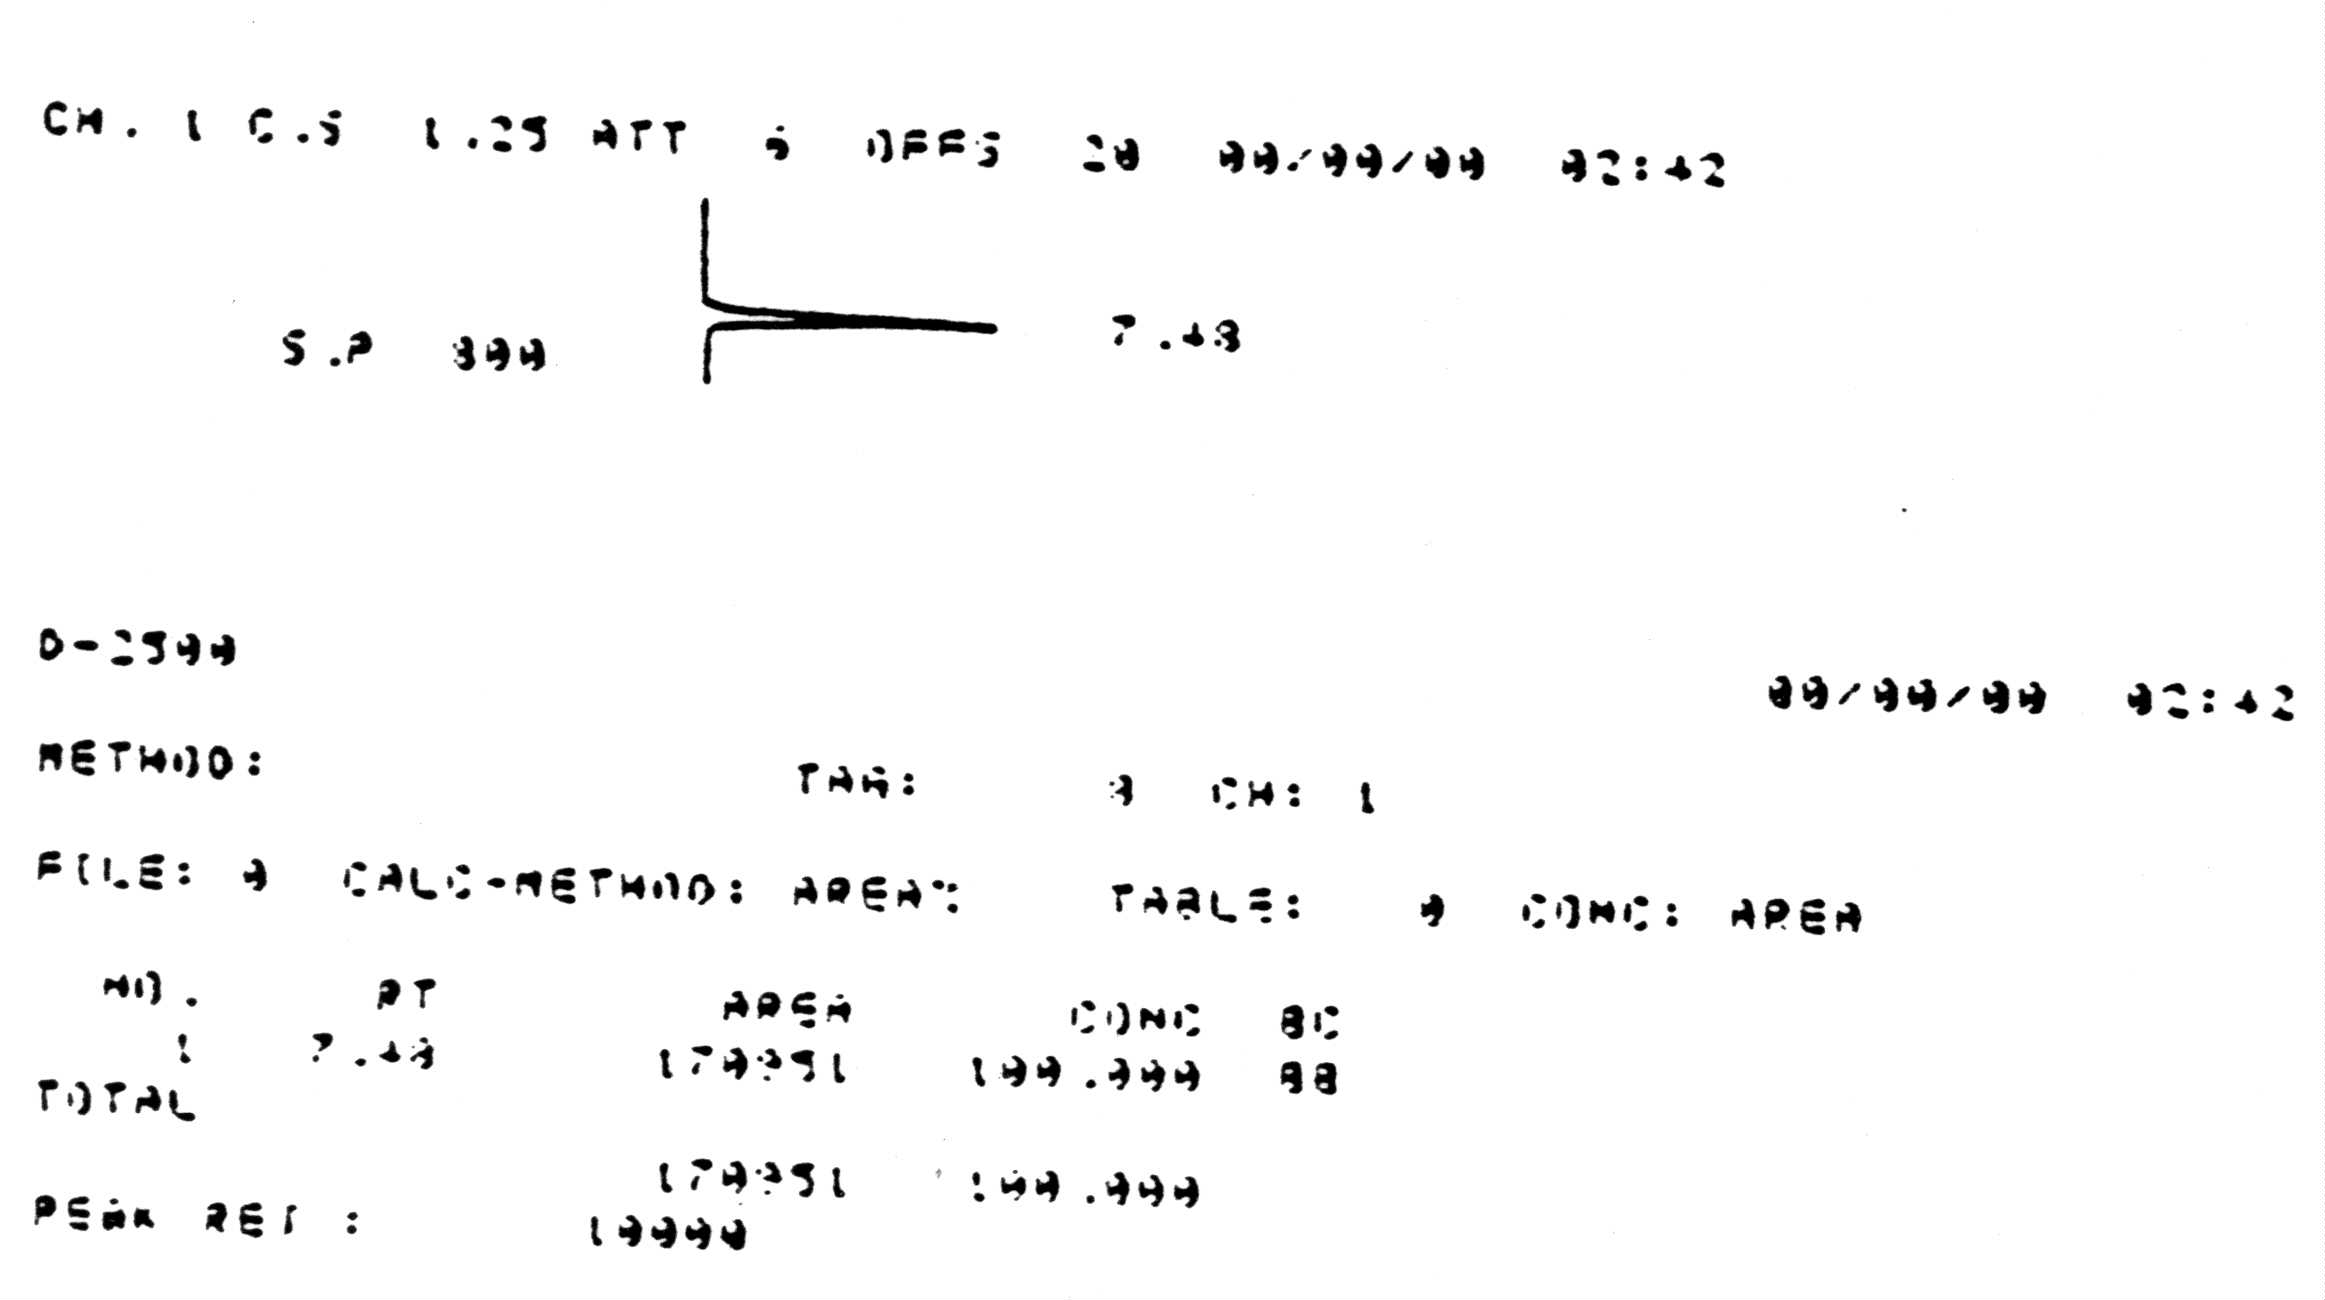


Reaction Product

Detector: RI

Column: Chiracel OD

Eluent: *n*-Hexane/2-Propanol = 60/1

Rate:1mL/min

Racemic Product


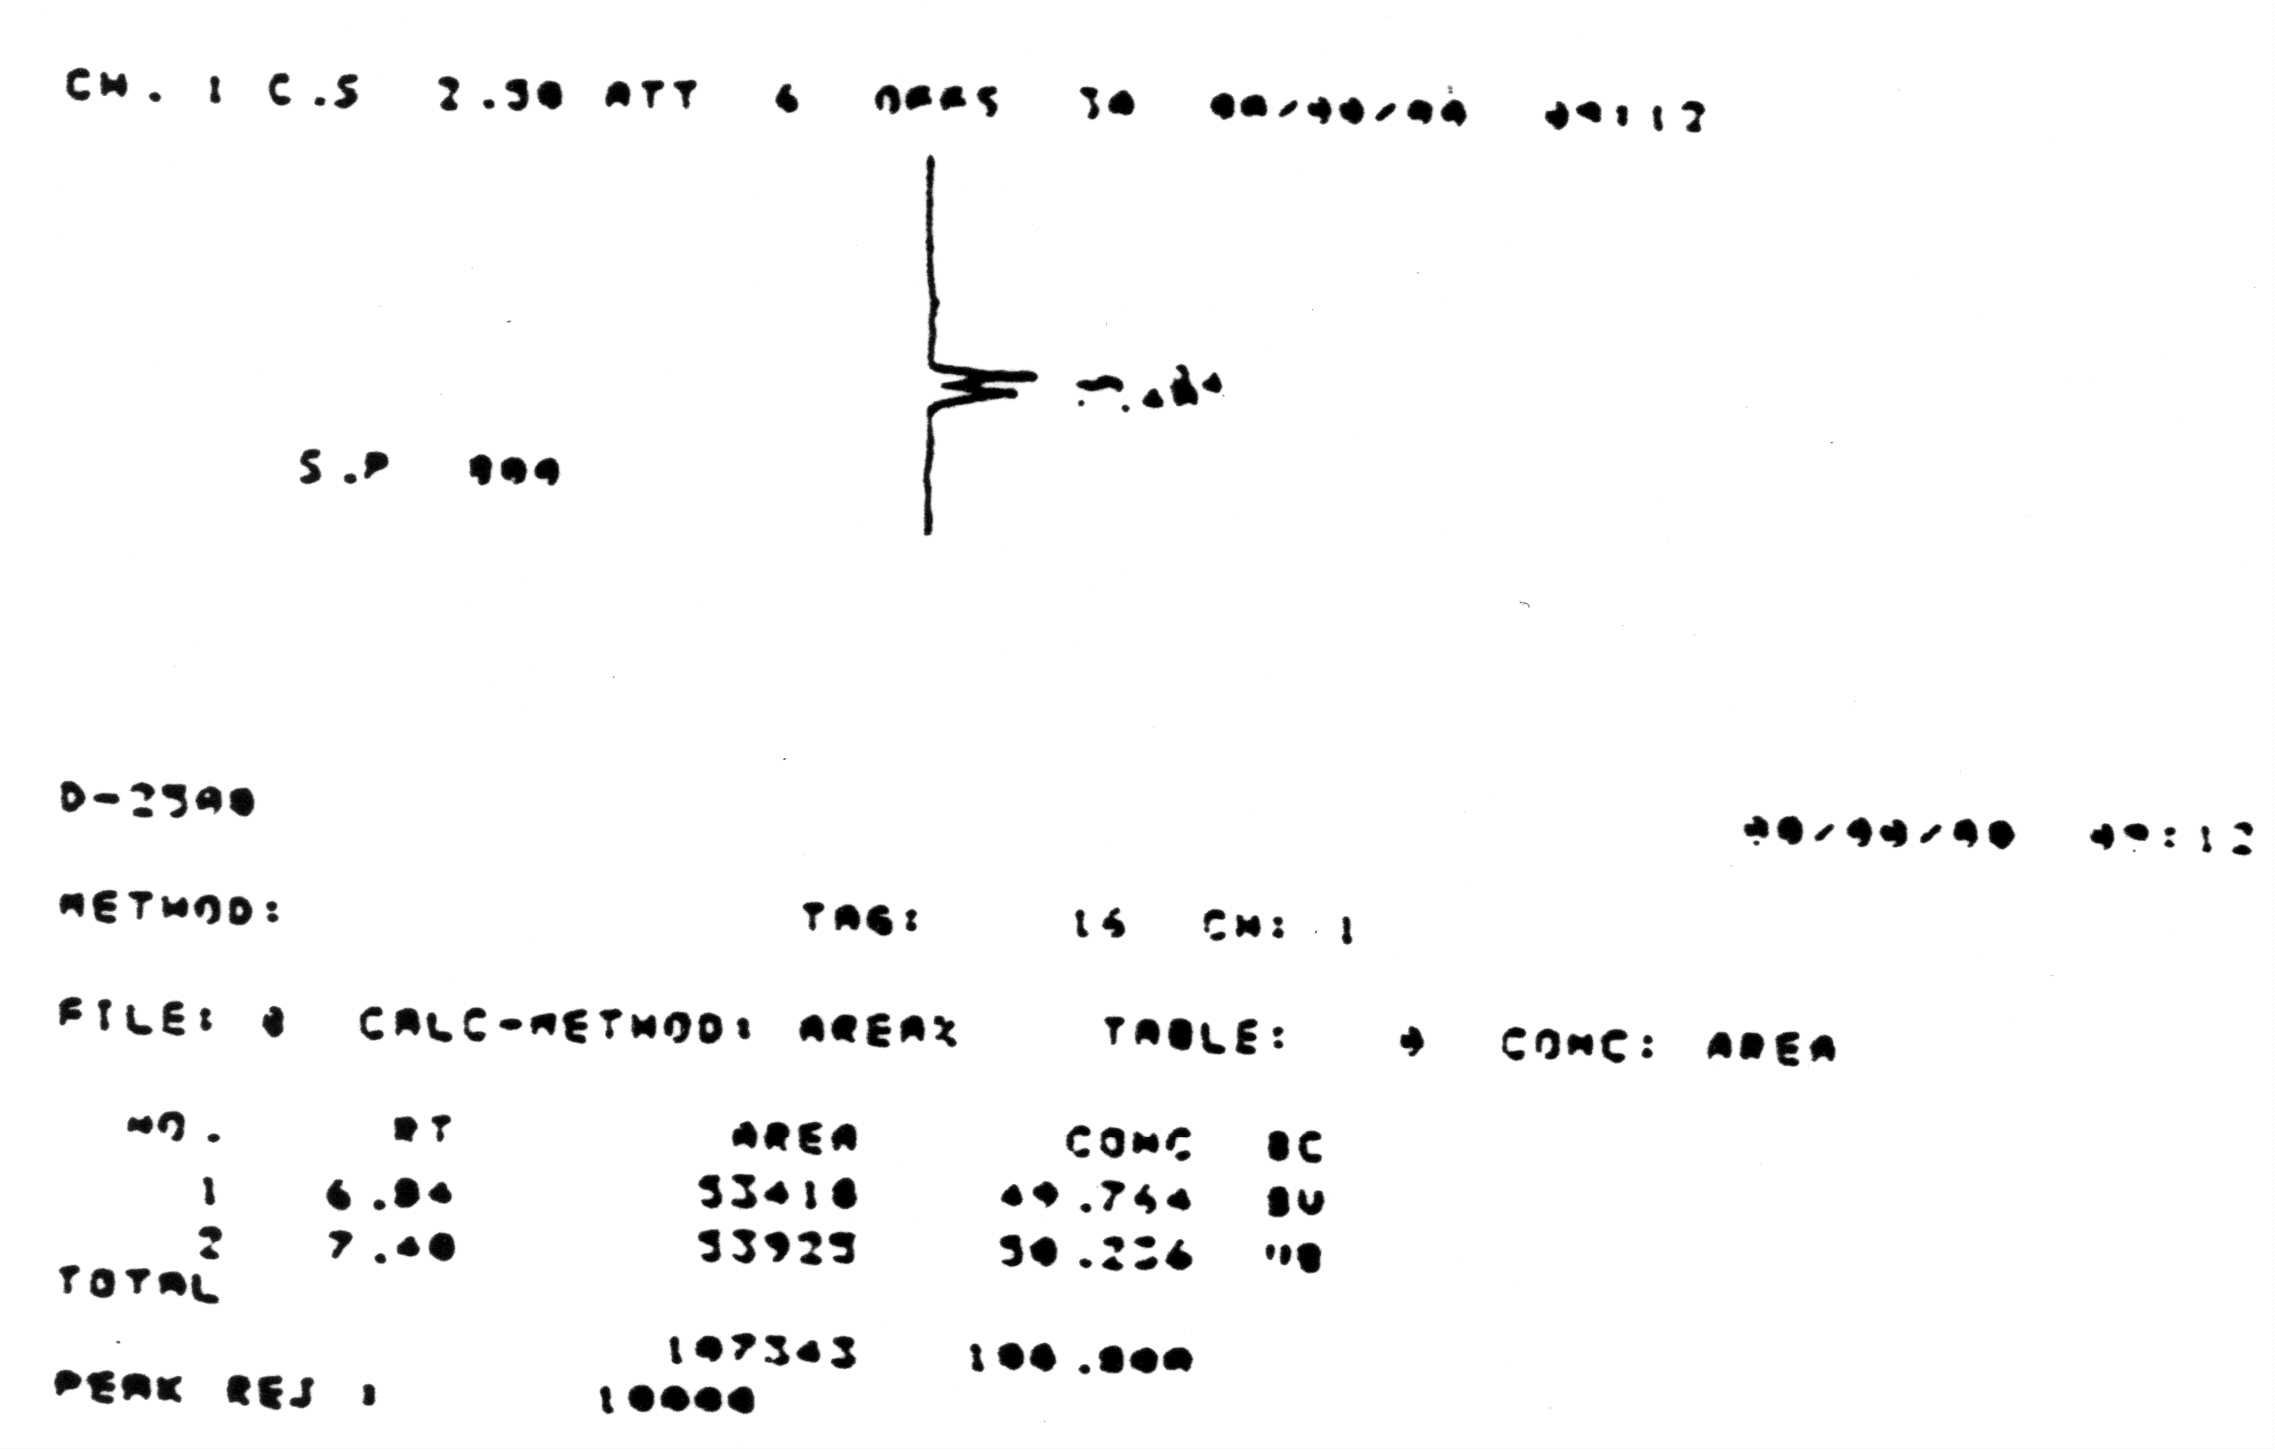


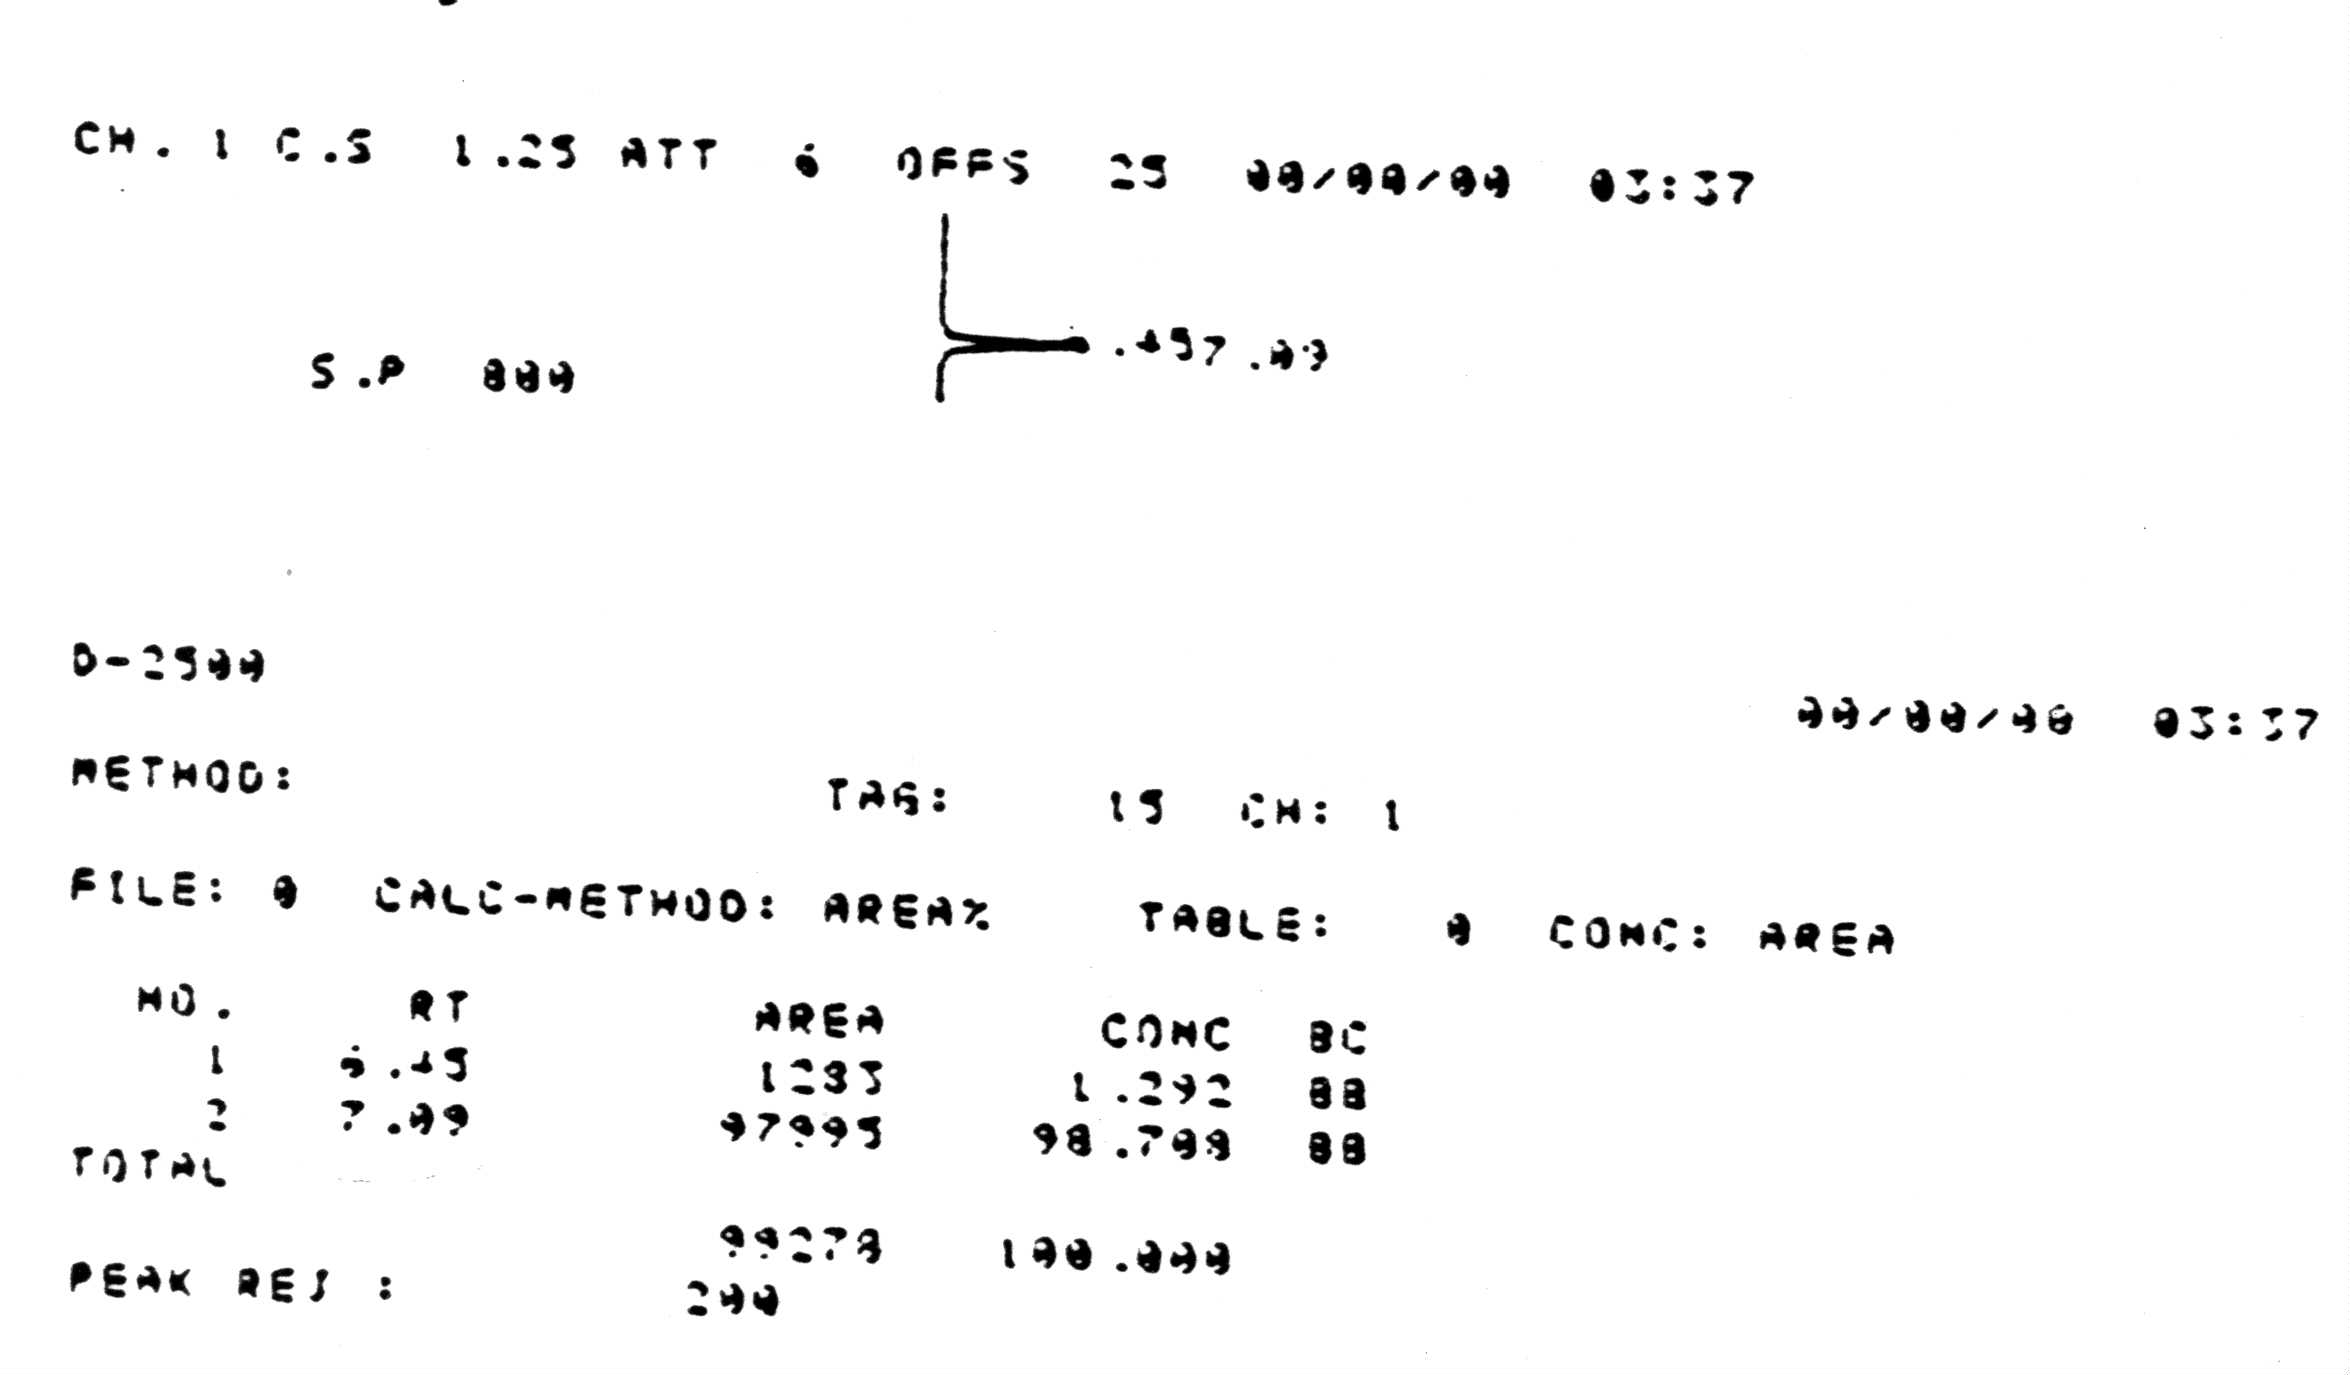


Reaction Product

Detector: RI

Column: Chiracel OD

Eluent: *n*-Hexane/2-Propanol = 60/1

Rate: 1mL/min

Racemic Product


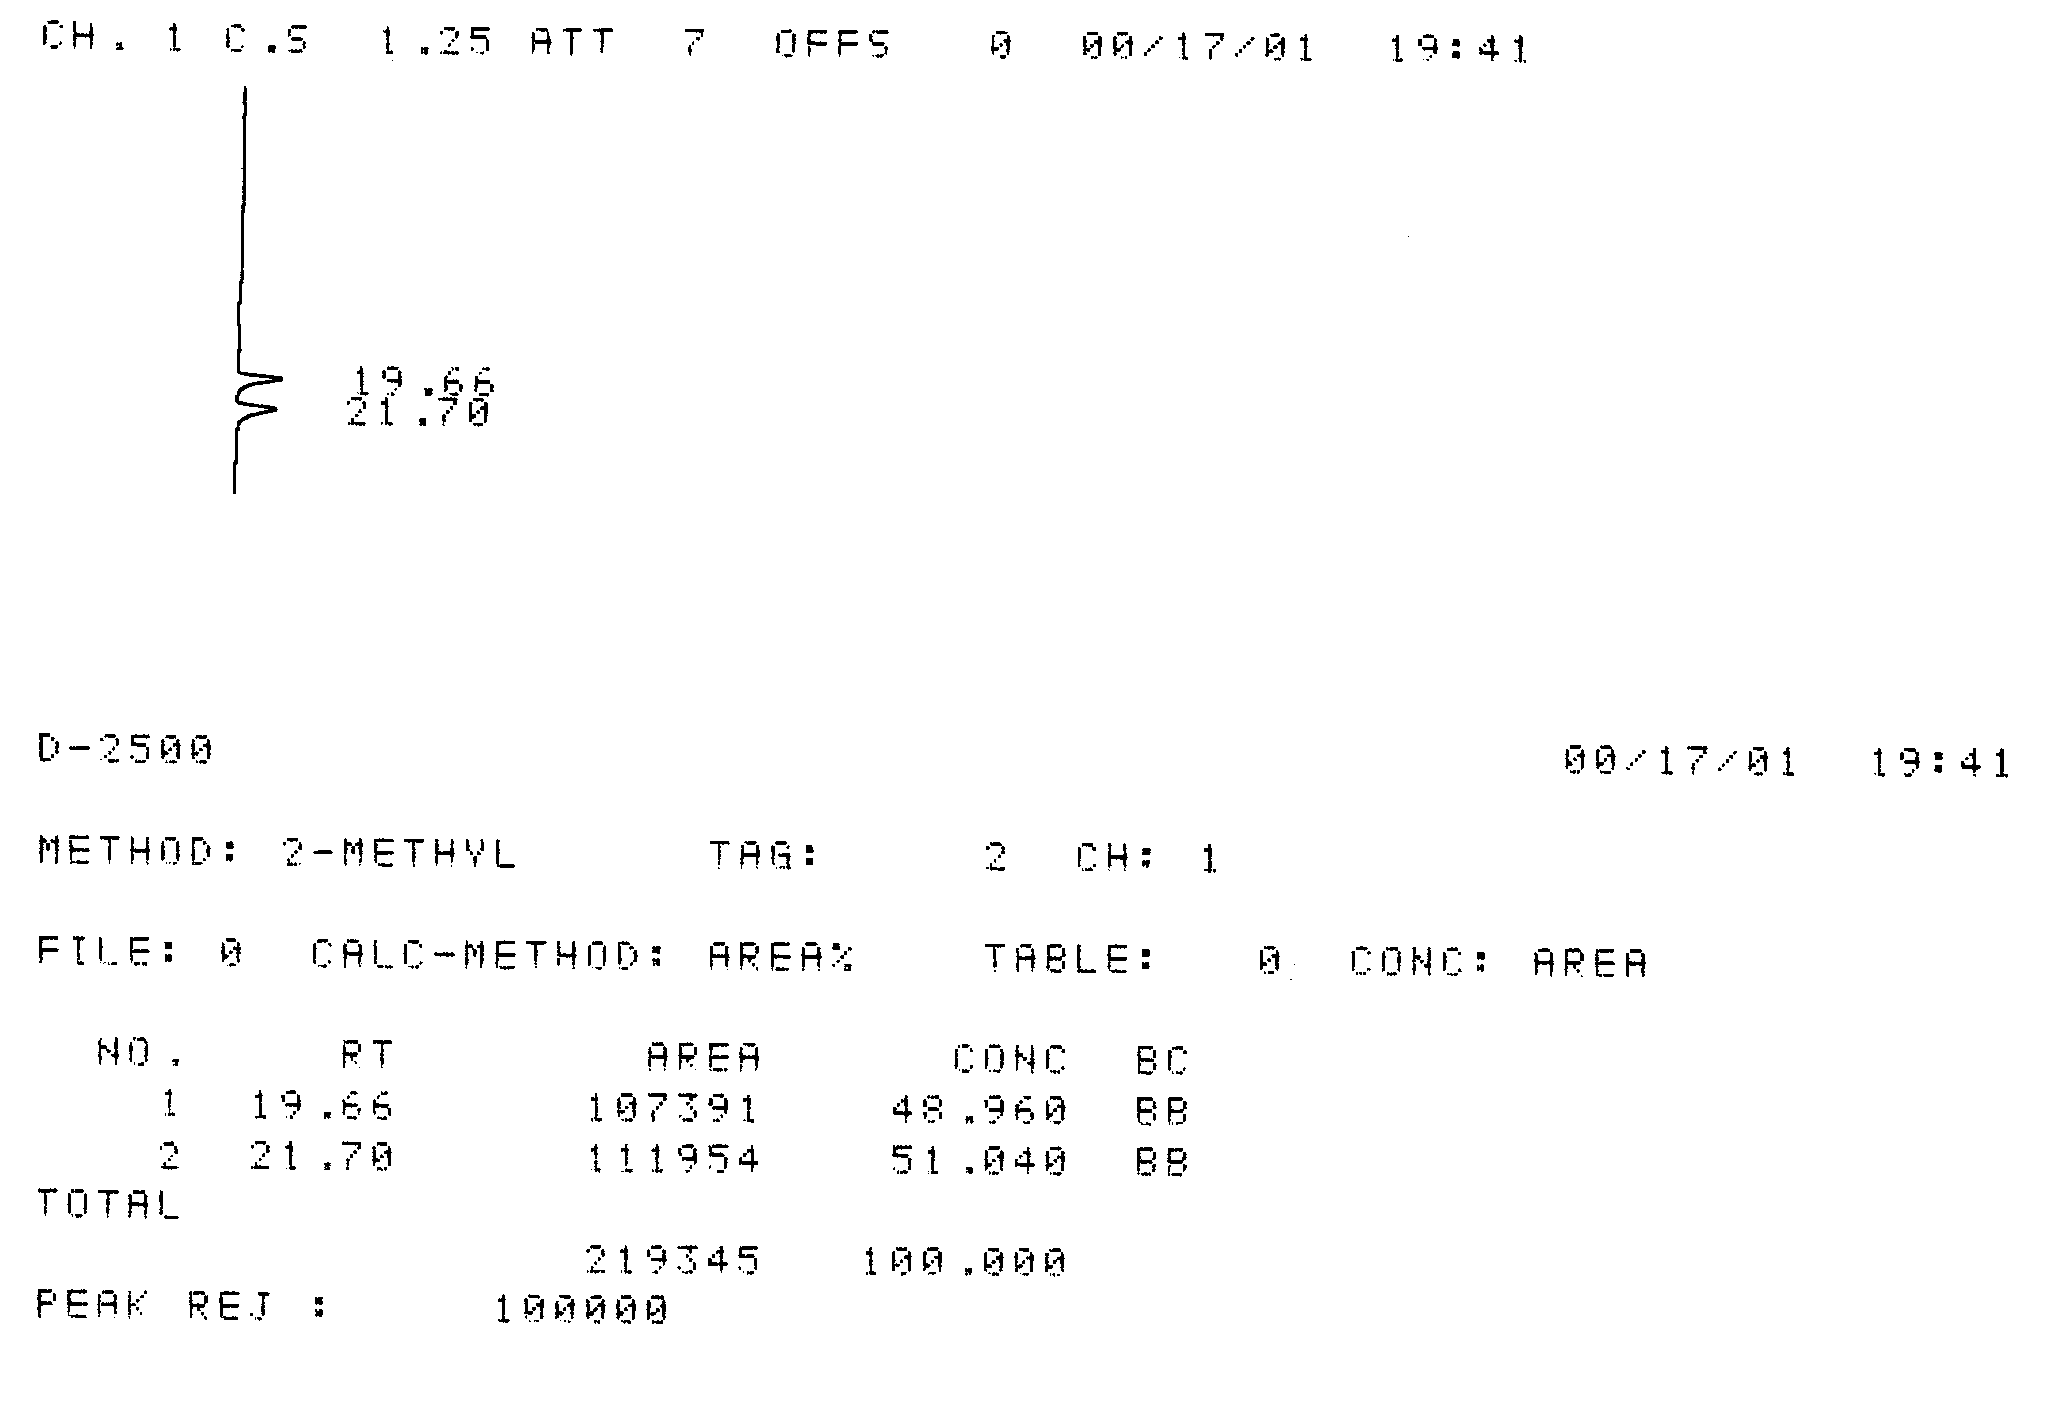


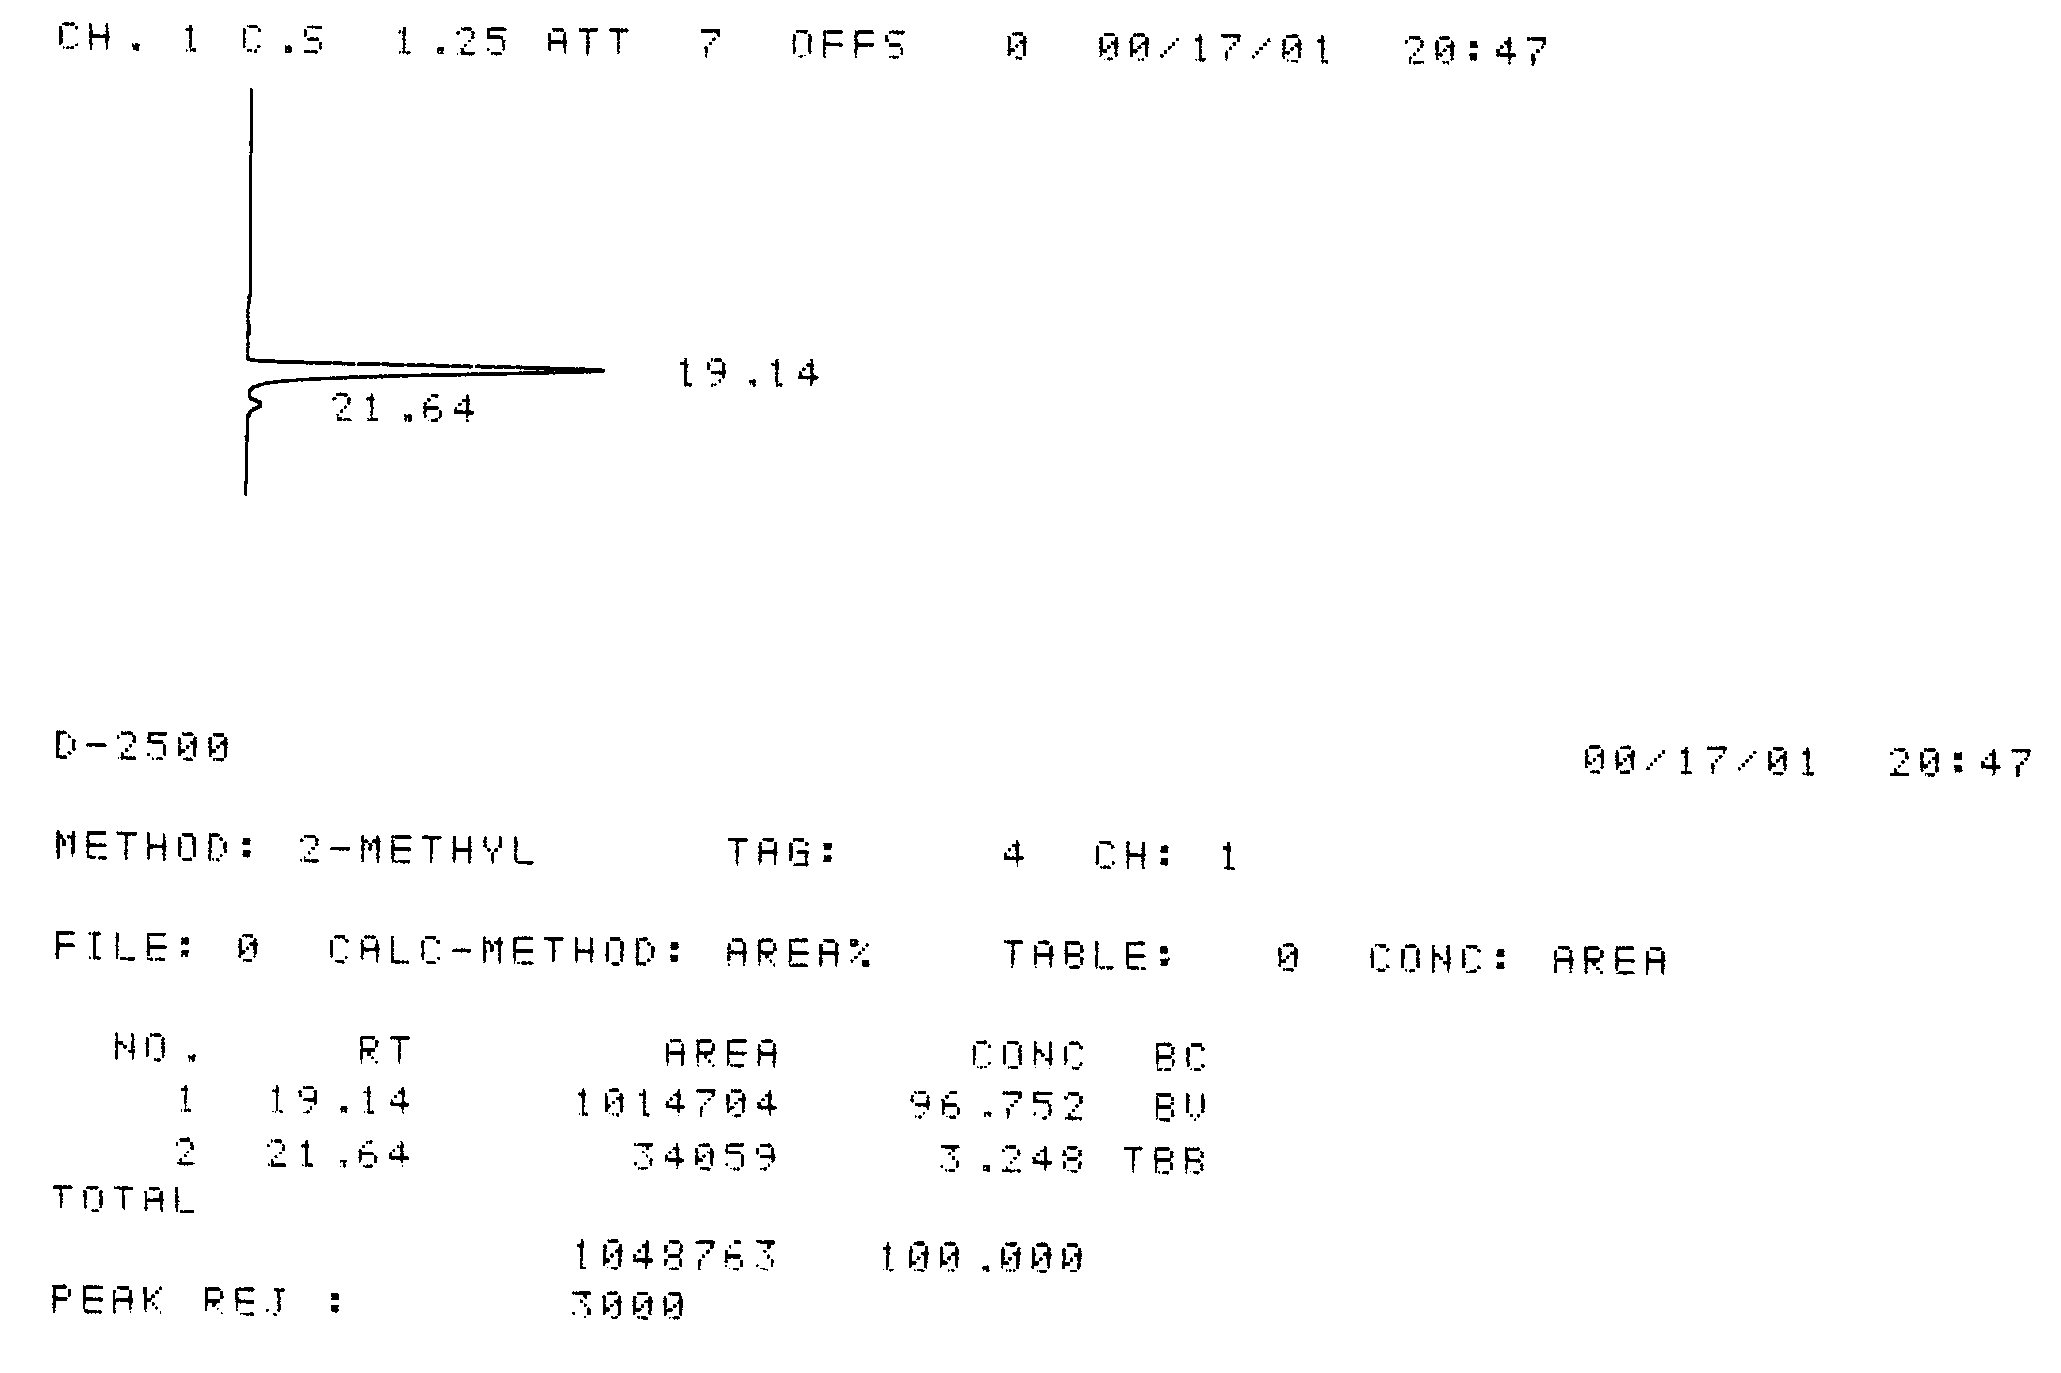


Reaction Product

Detector: UV, 254nm

Column: Chiracel OD

Eluent: *n*-Hexane/Ethyl acetate = 60/1

Rate: 1mL/min


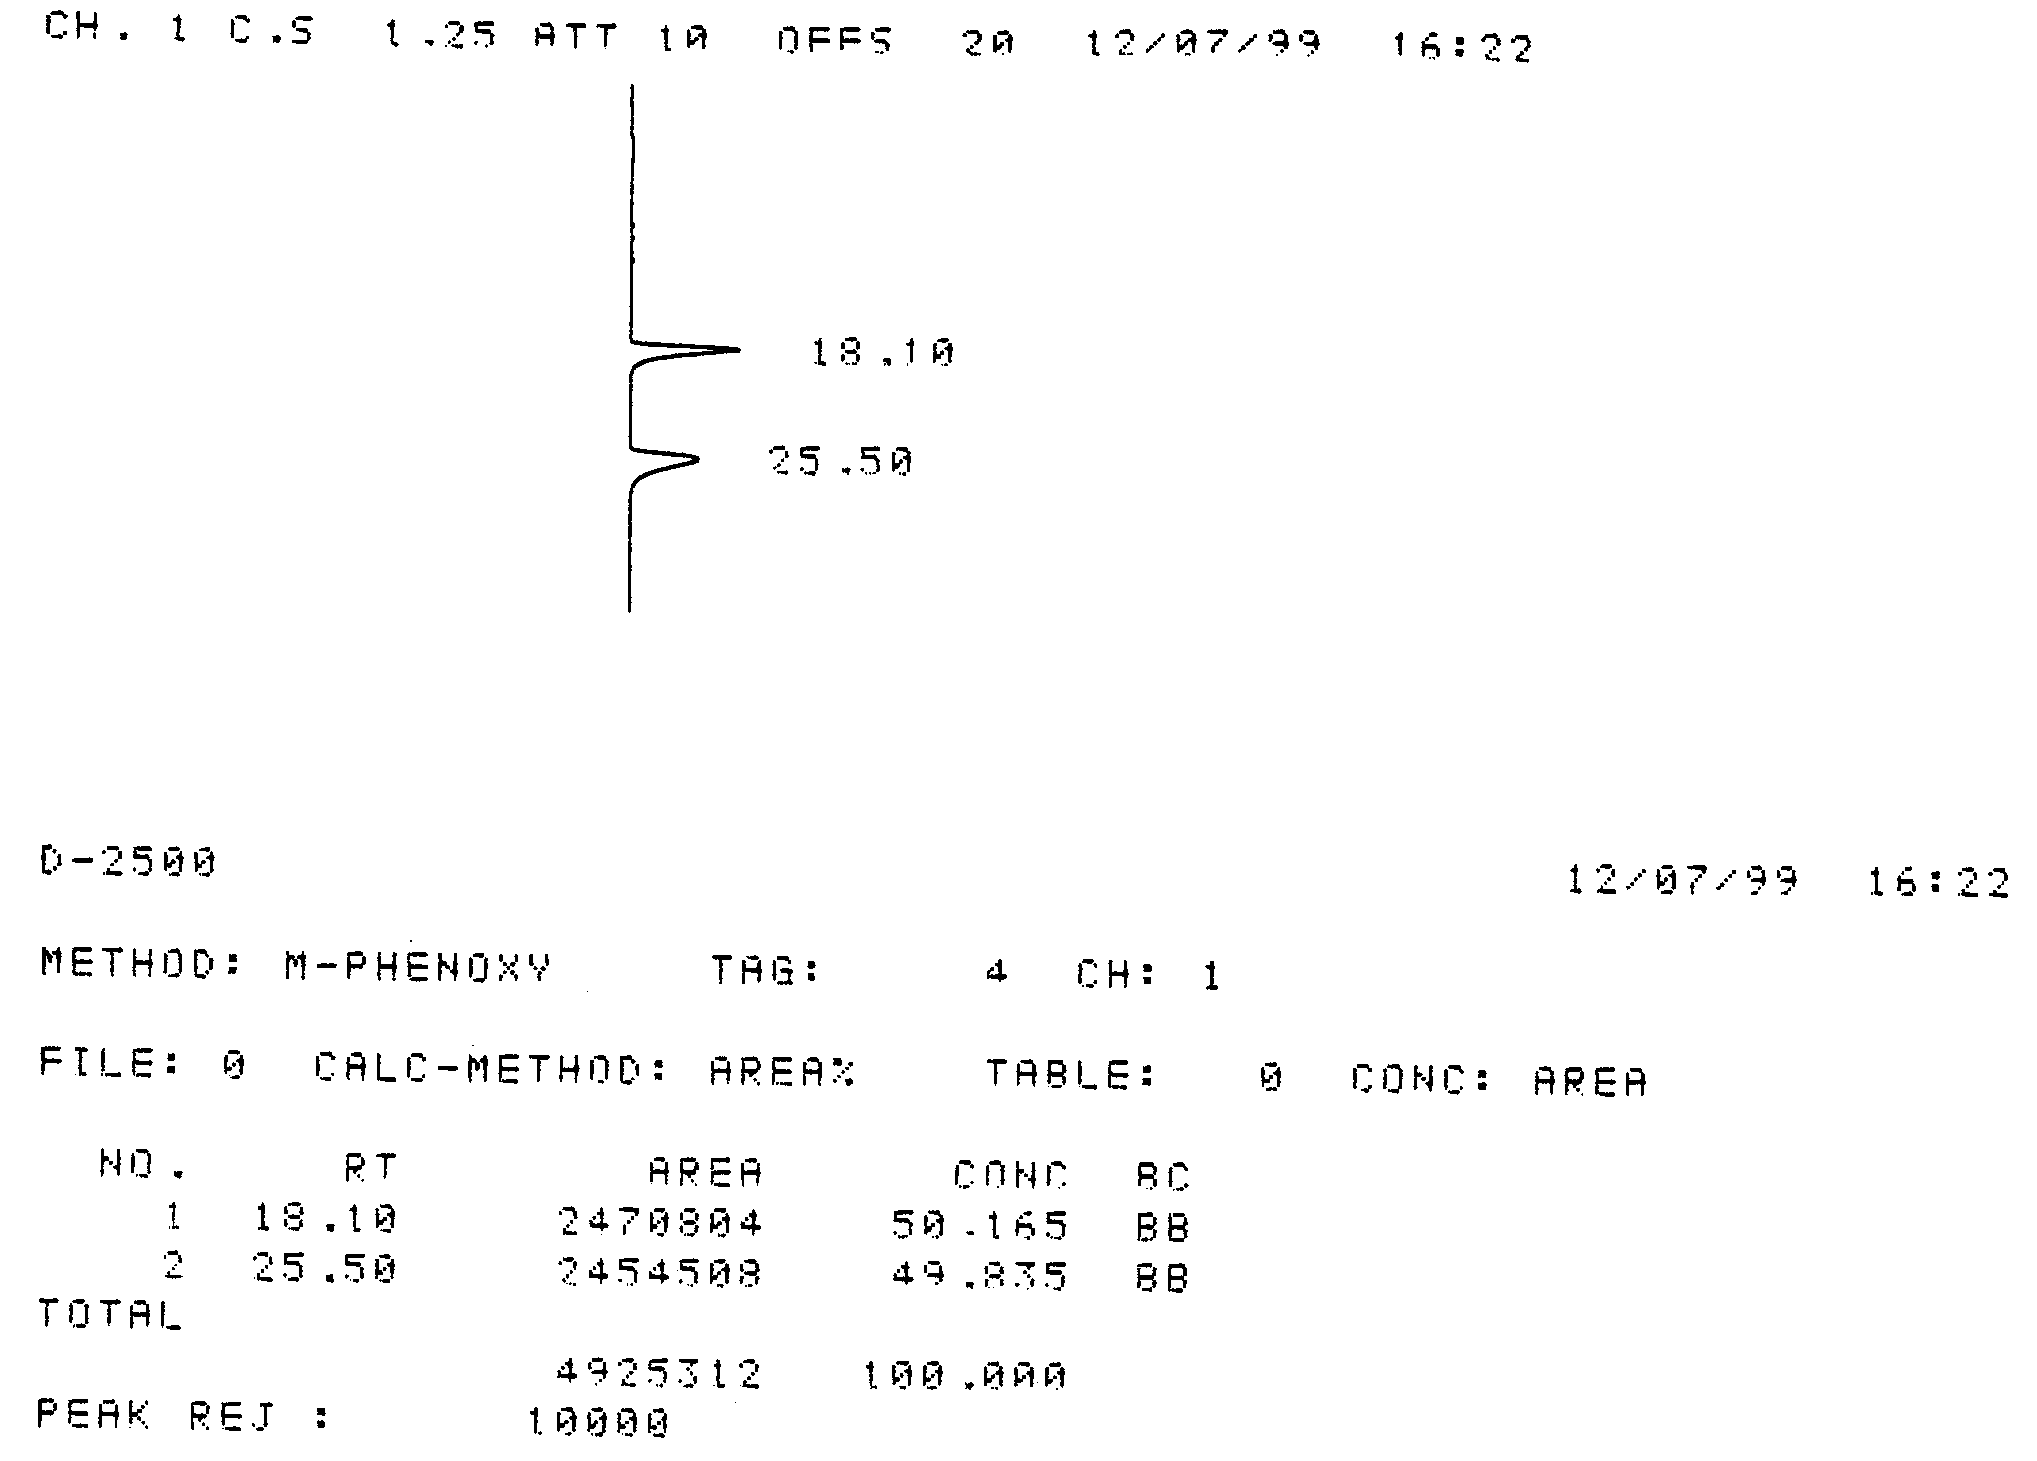


Racemic Product


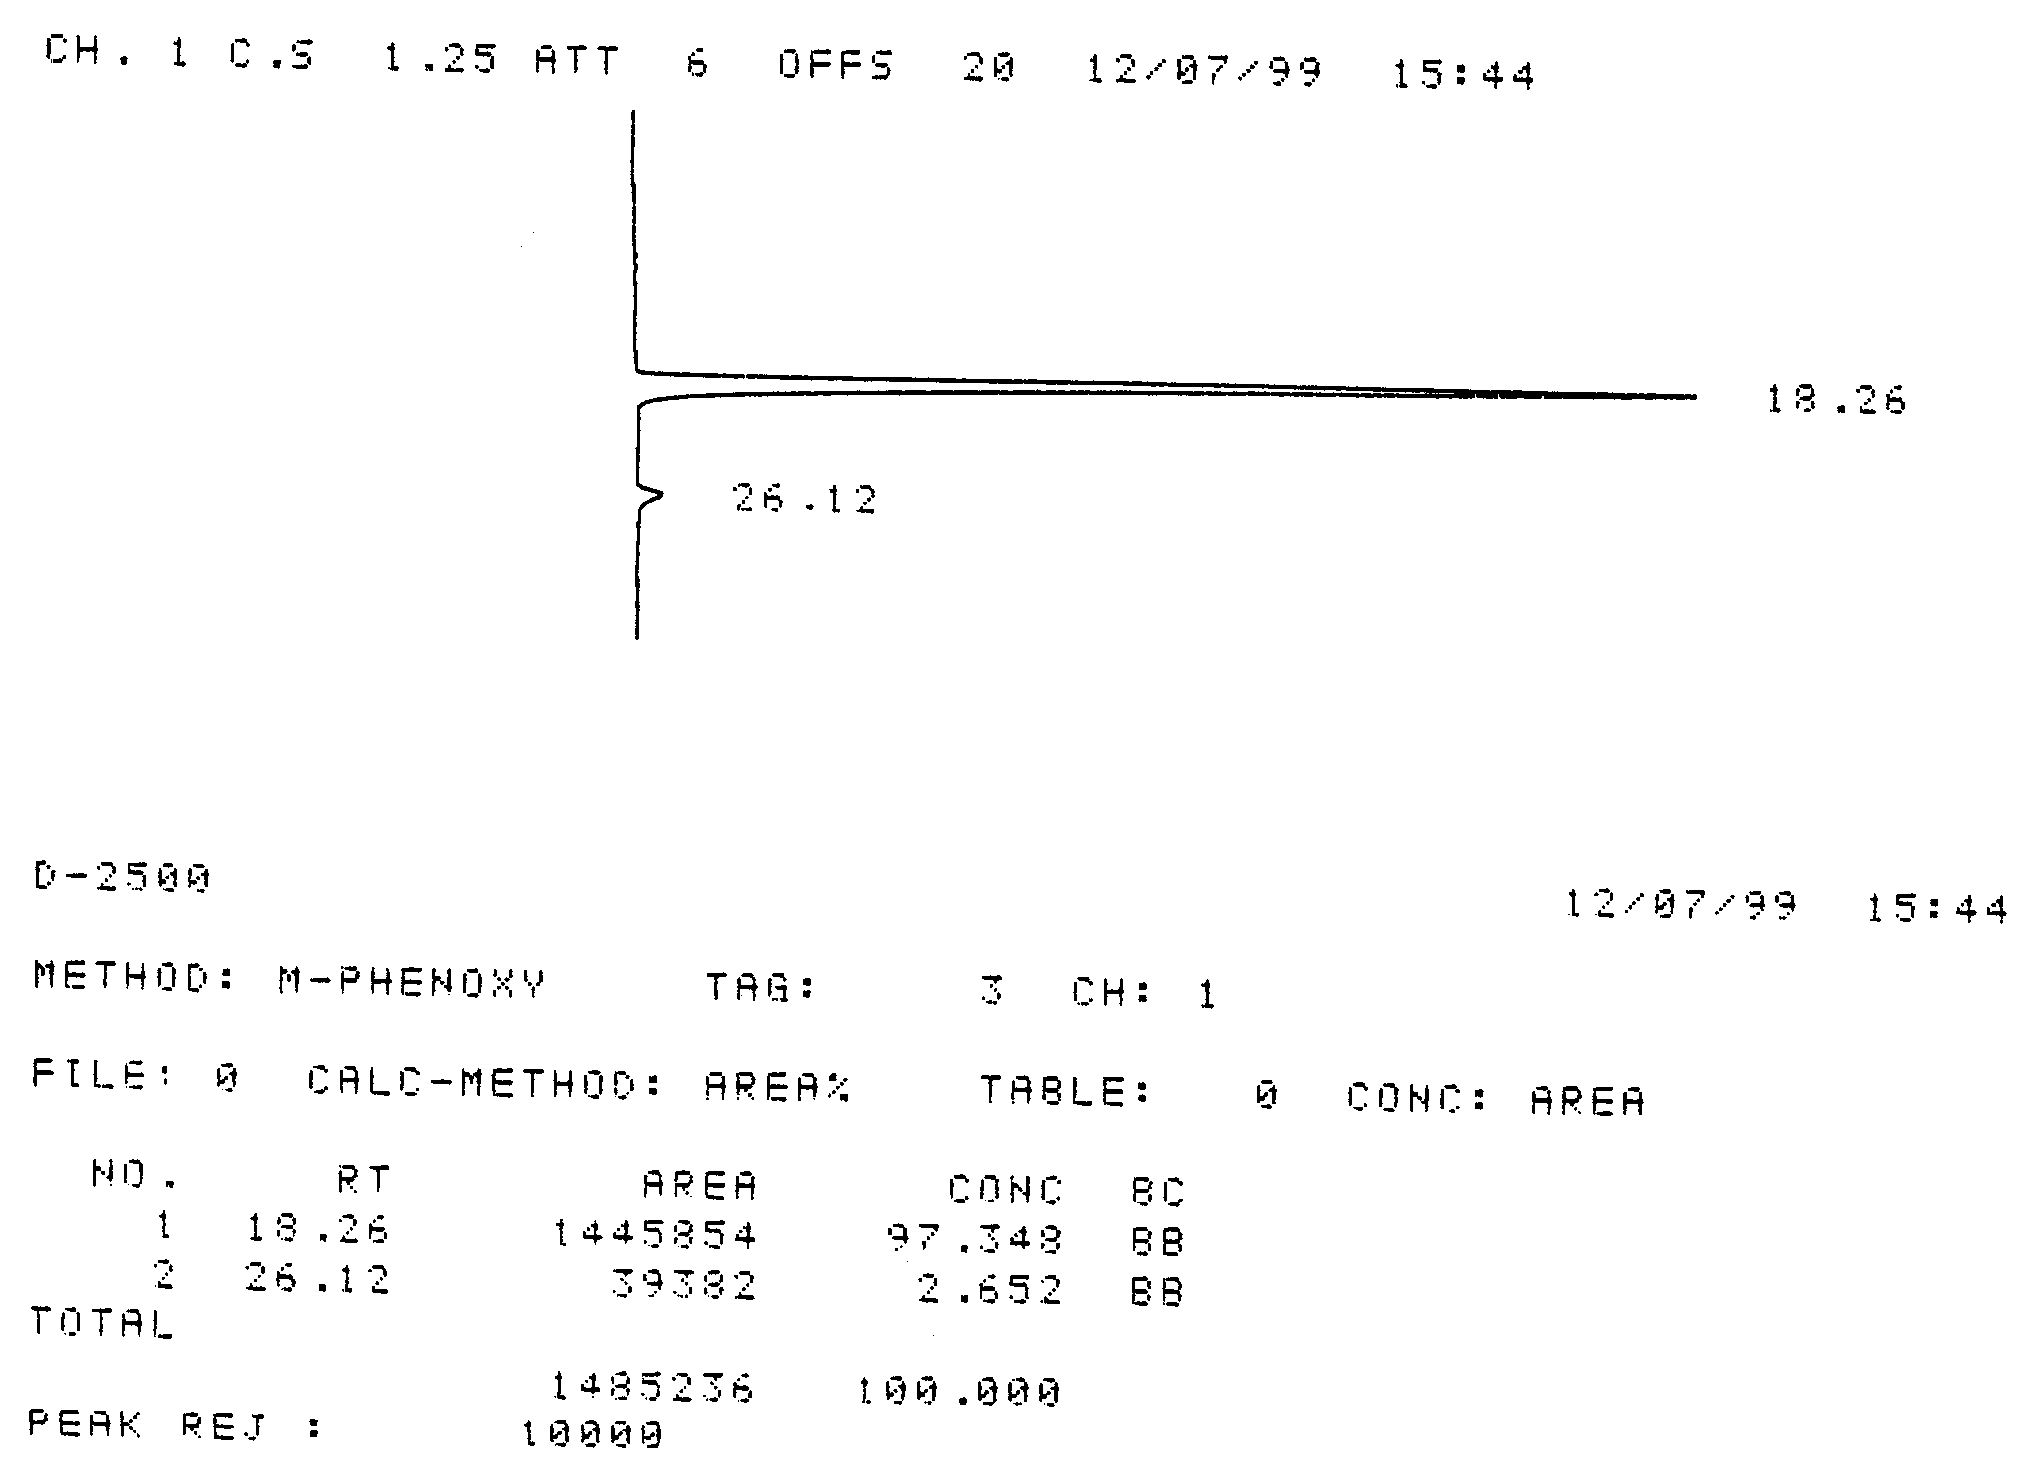


Reaction Product

Detector: UV, 254nm

Column: Chiracel OD

Eluent: *n*-Hexane/2-Propanol = 97.5/2.5

Rate: 1mL/min

Racemic product


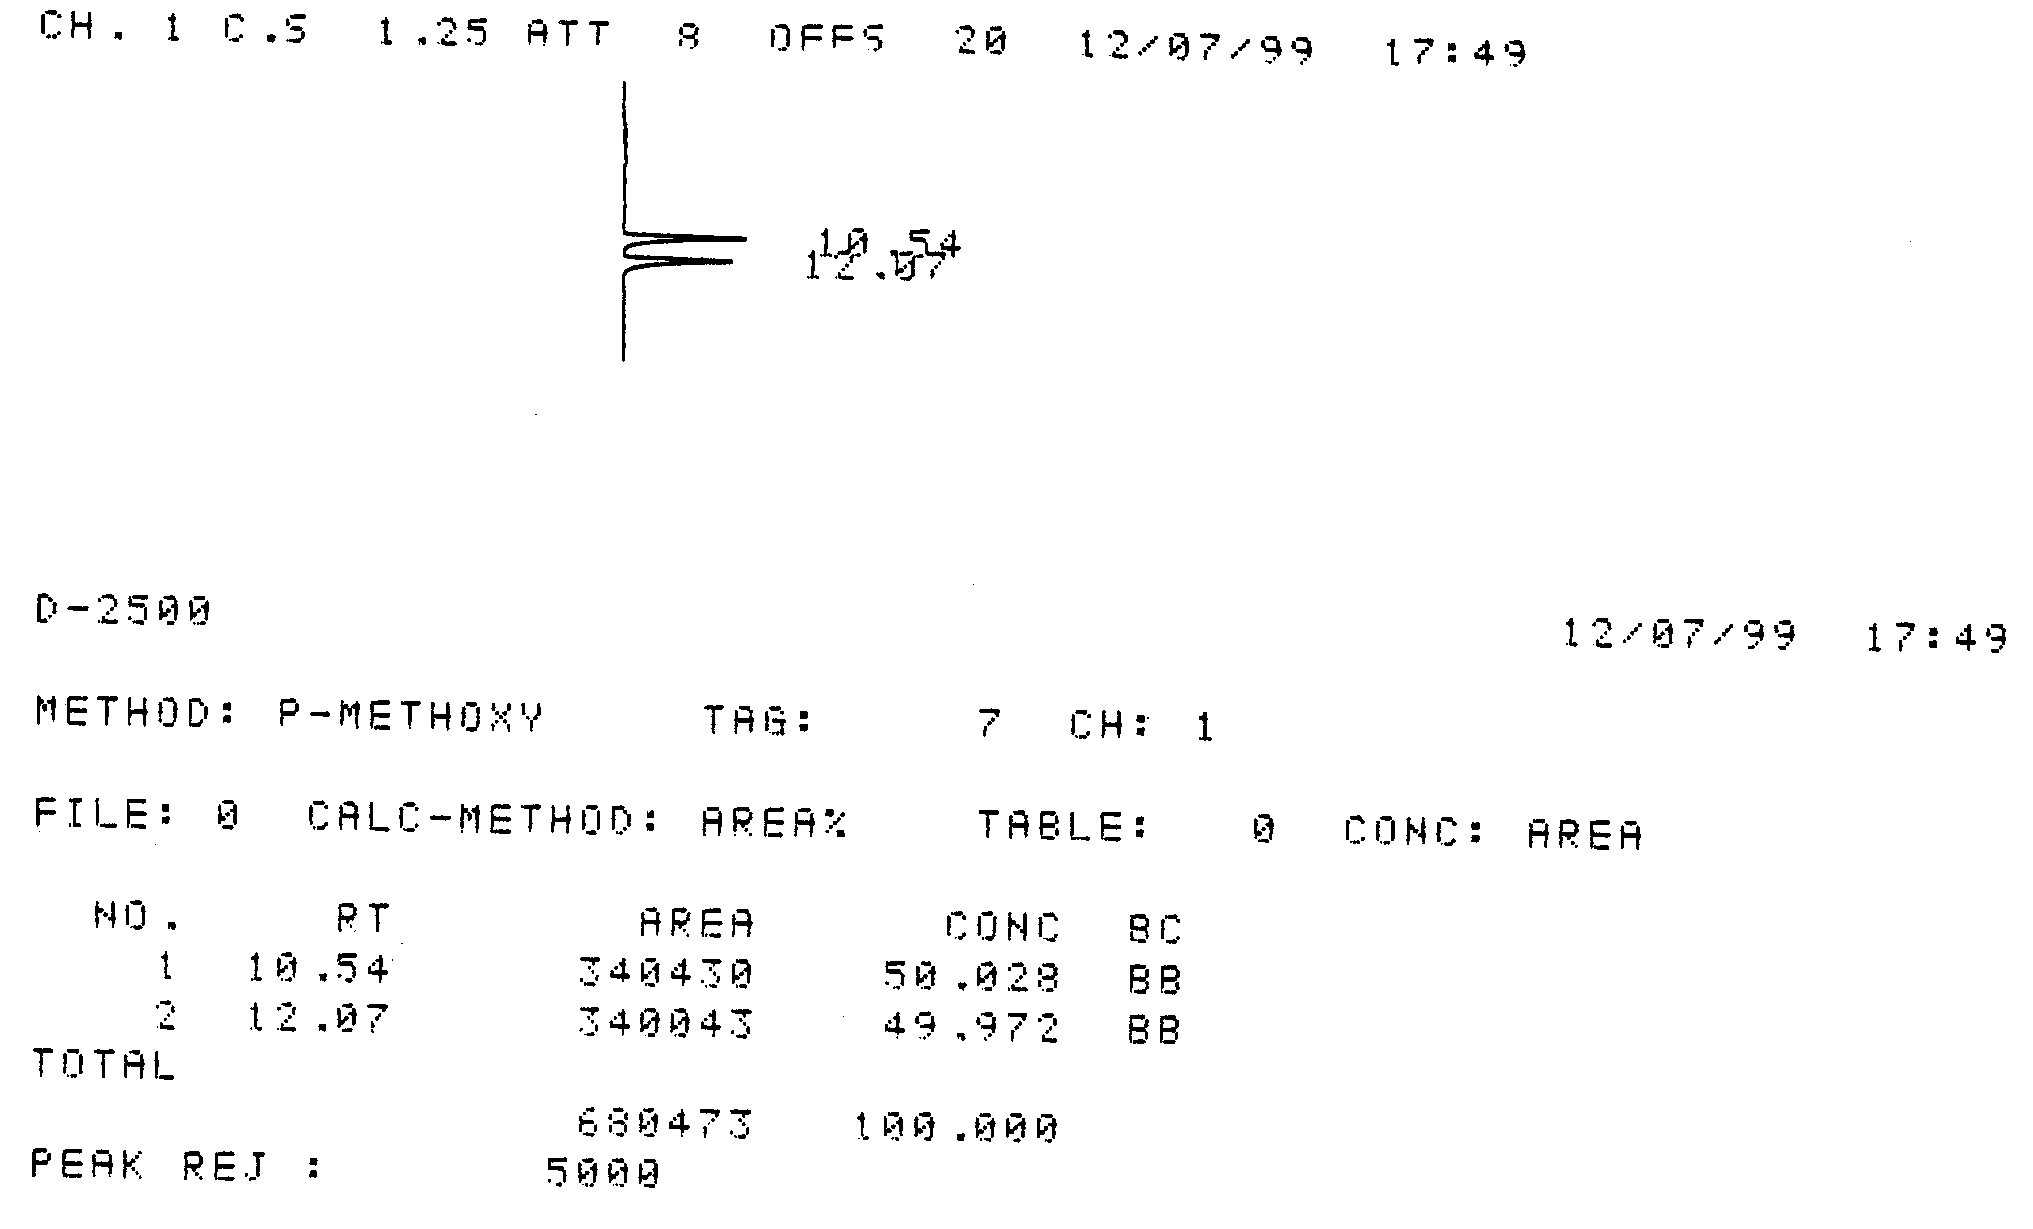


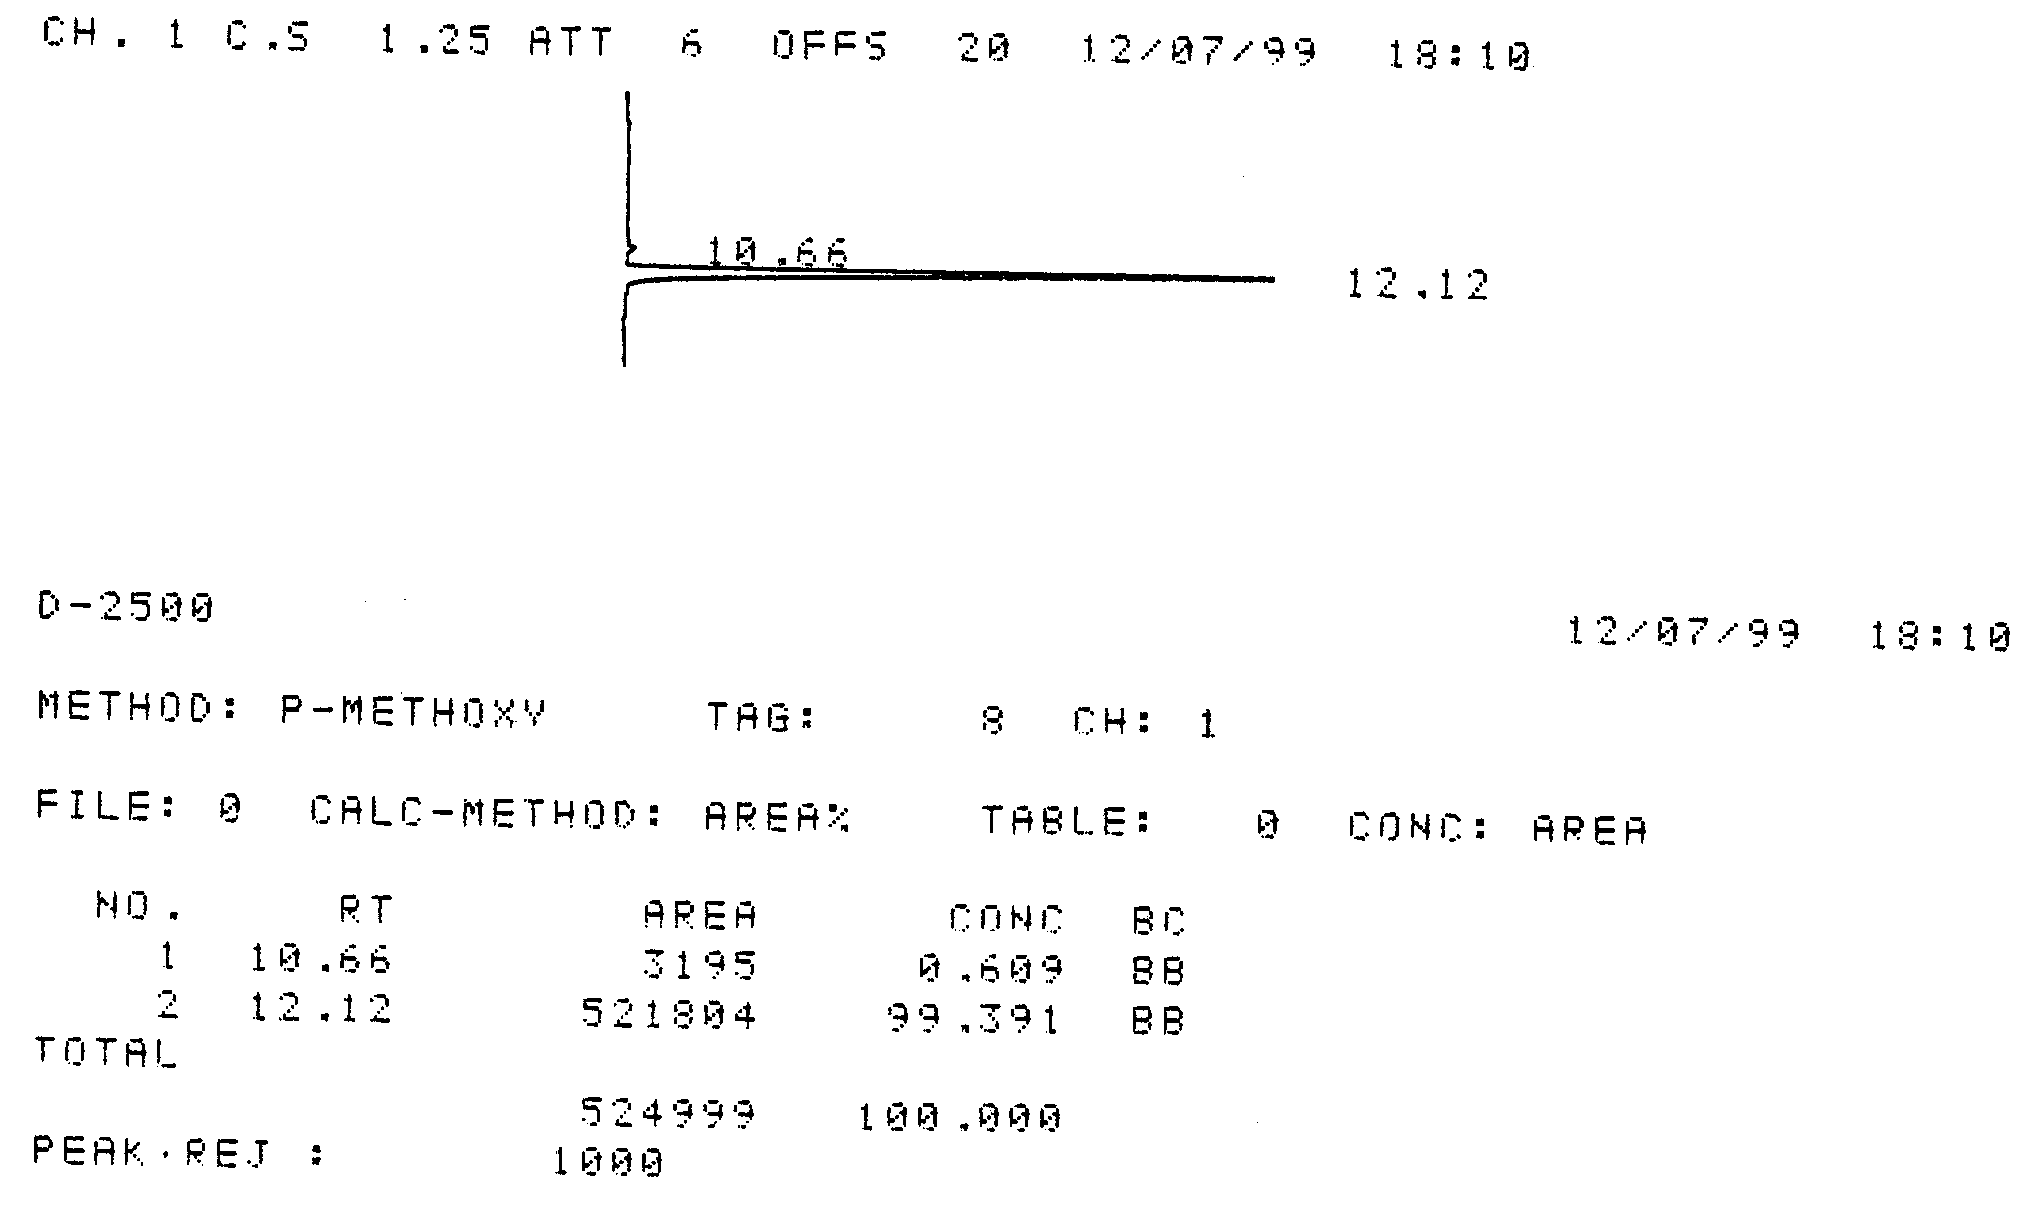


Reaction Product

Detector: UV, 254nm

Column: Chiracel OD

Eluent: *n*-Hexane/2-Propanol = 95/5

Rate: 1mL/min


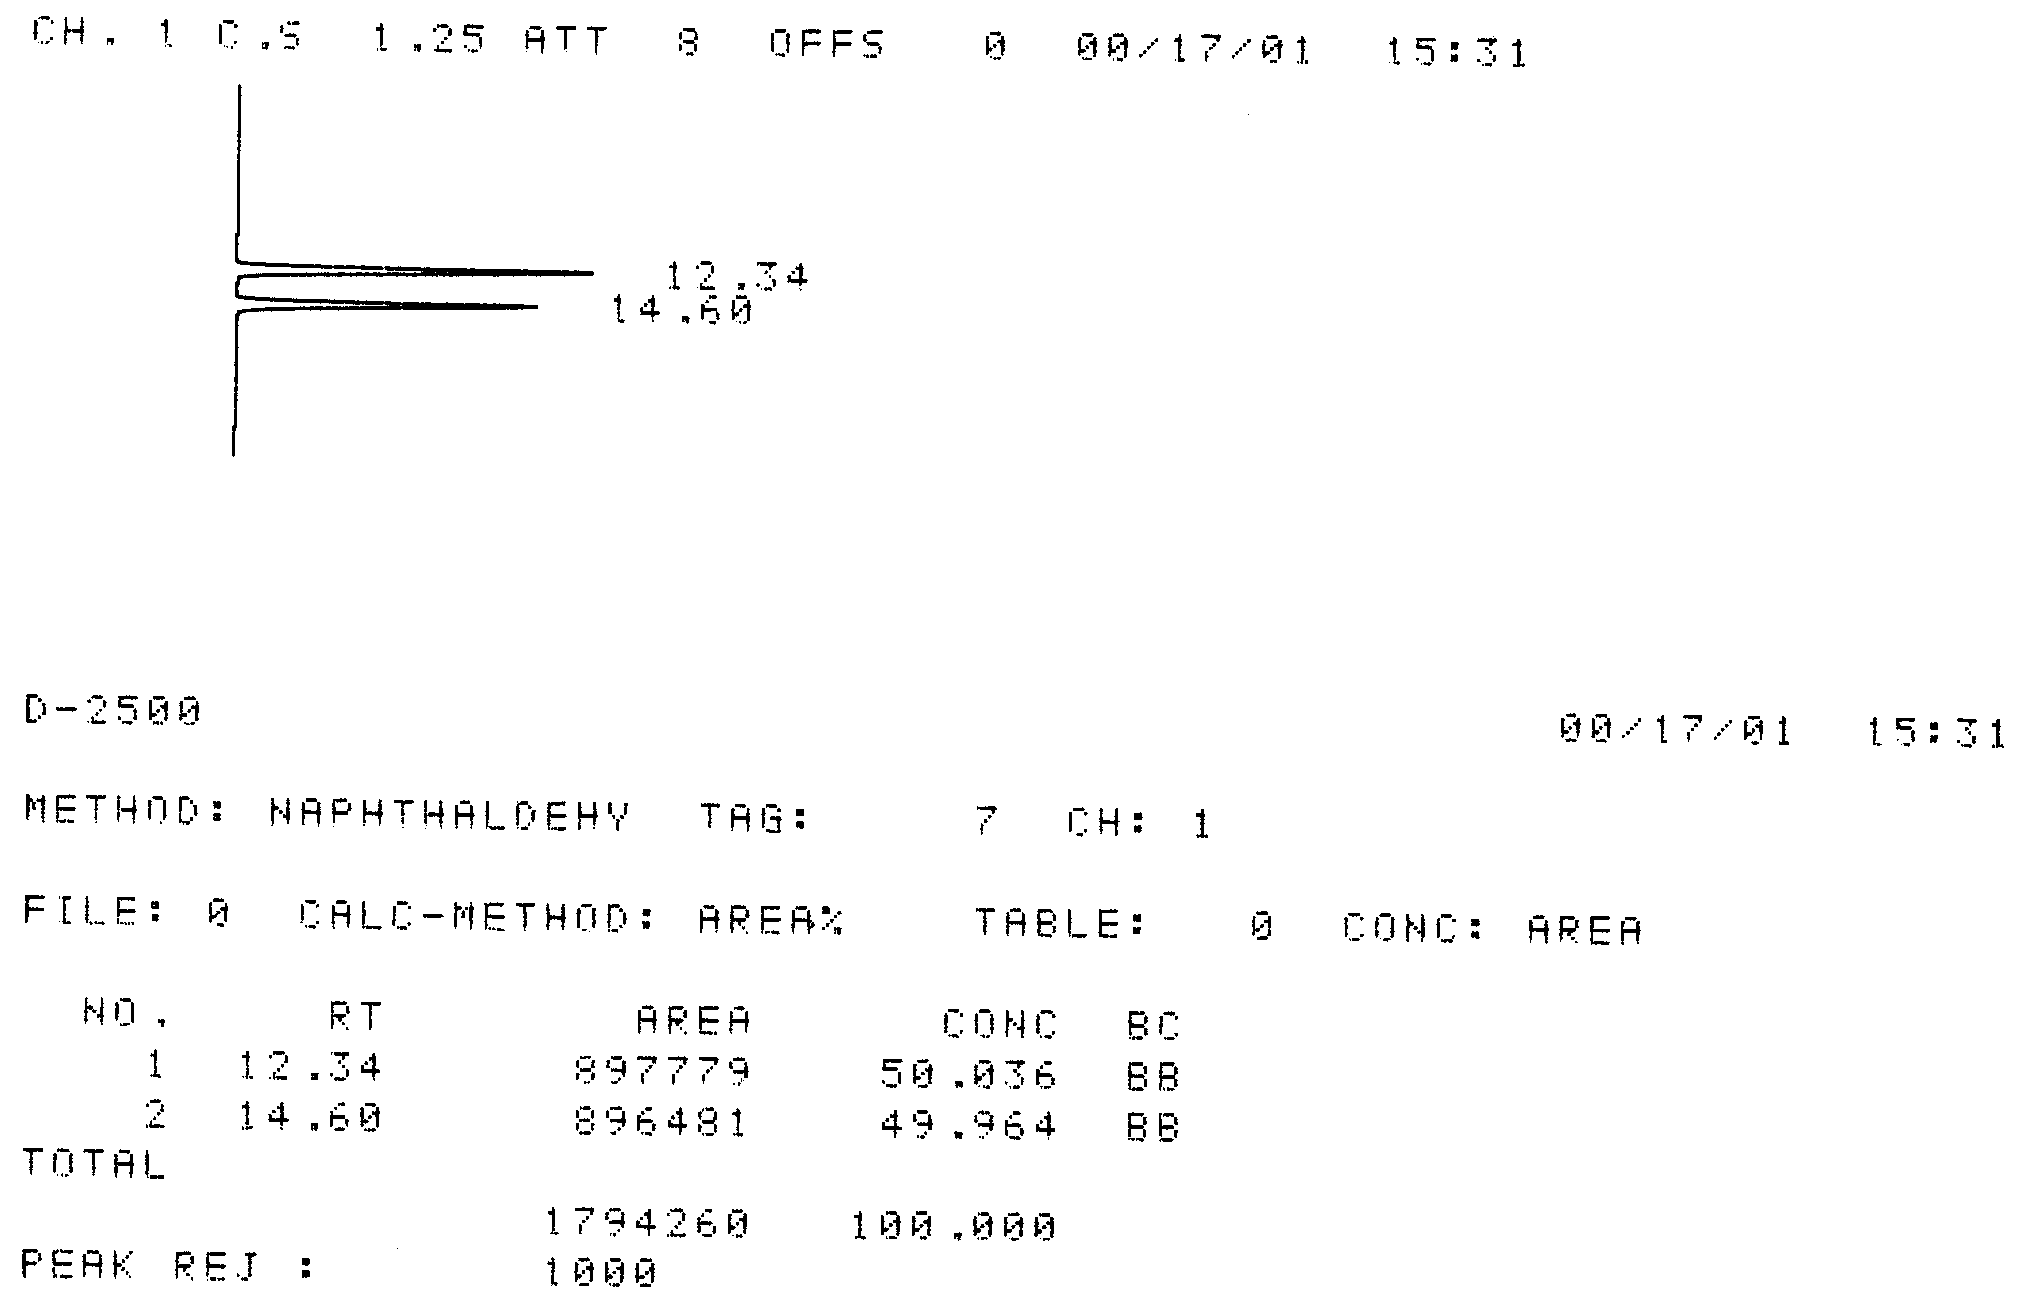


Racemic Product


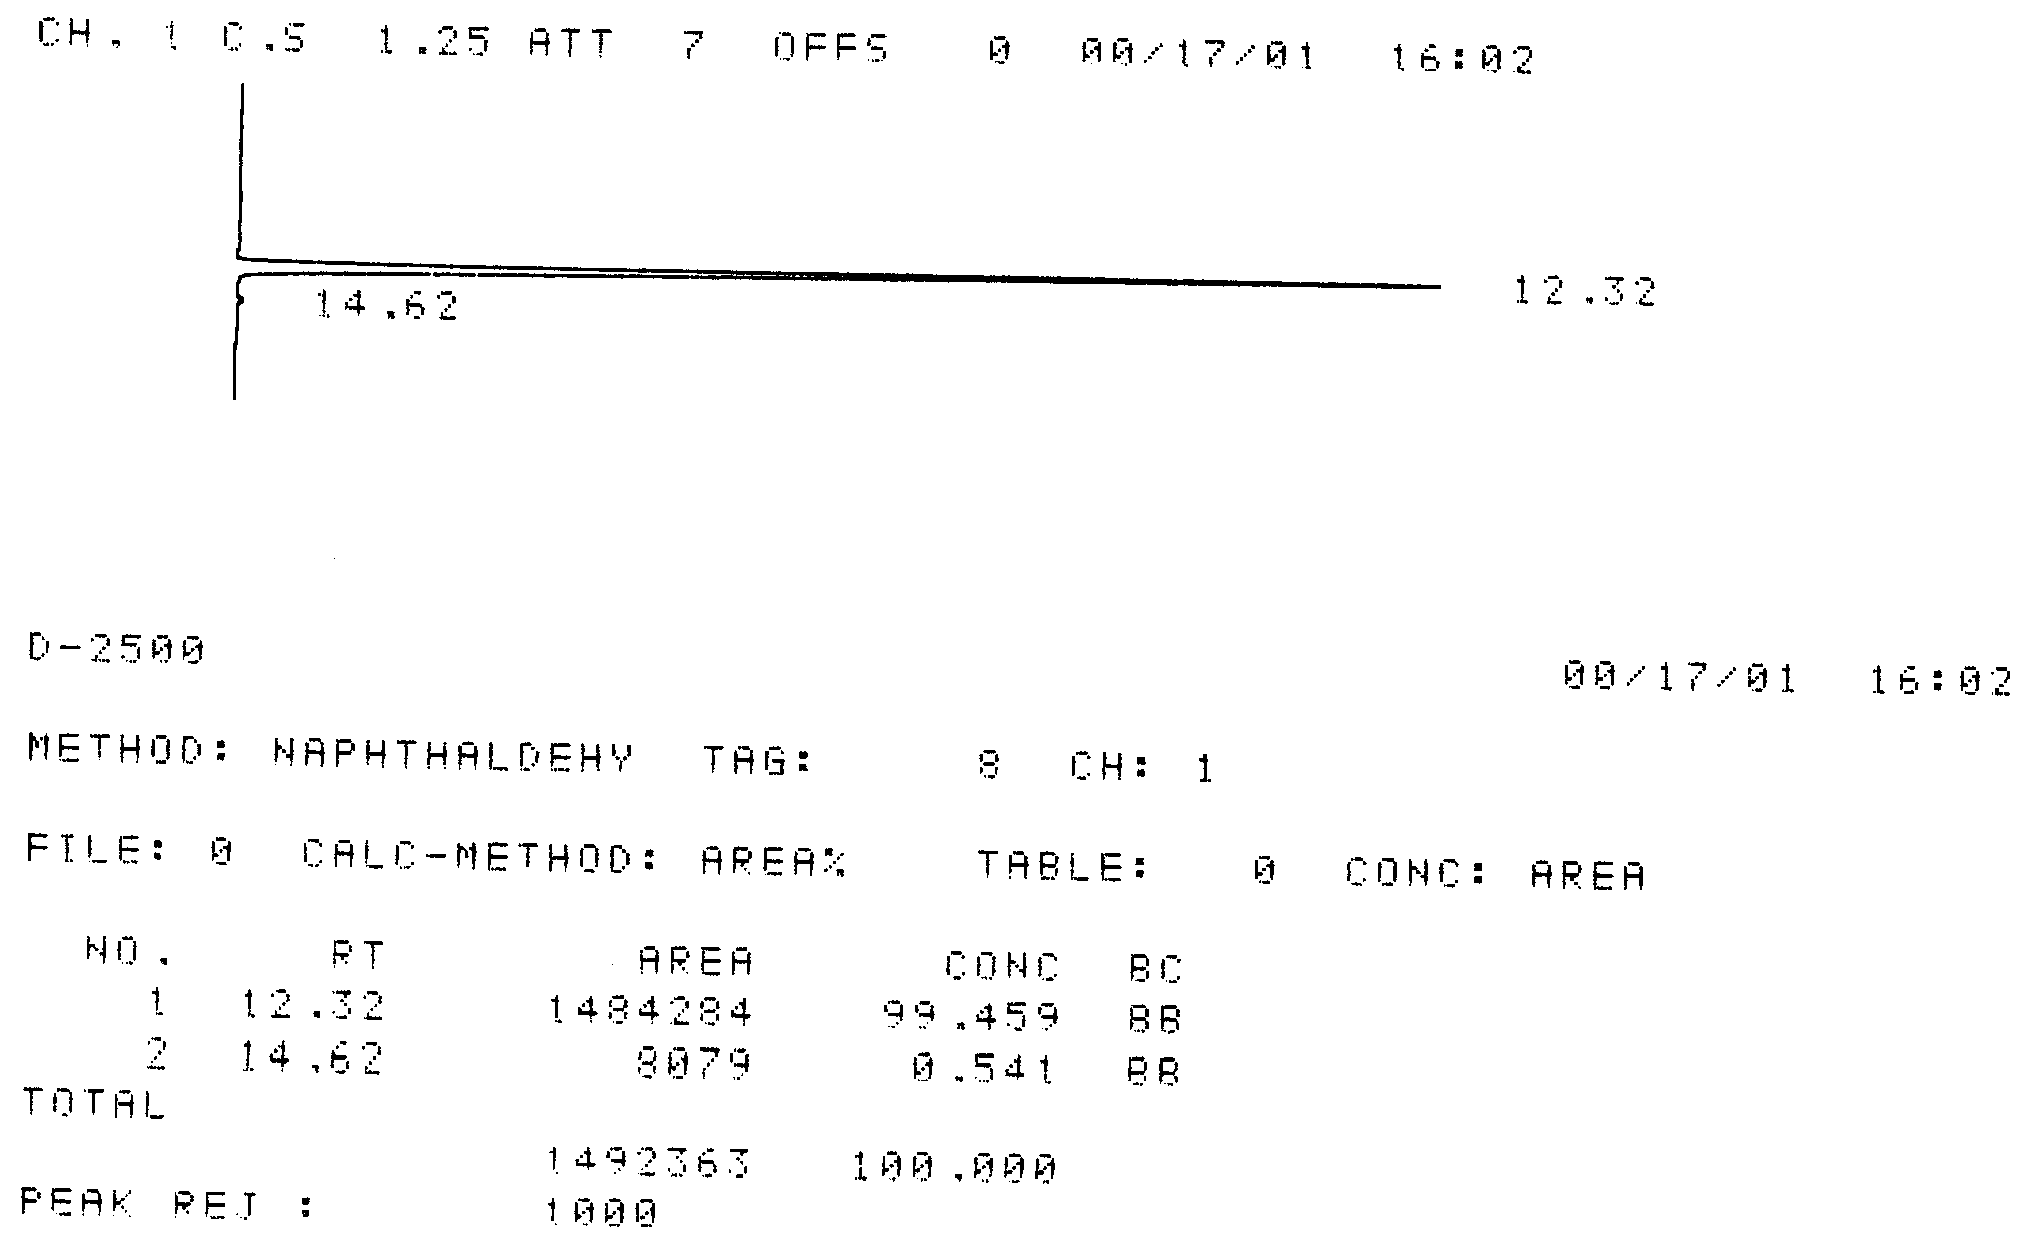


Reaction Product

Detector: UV, 254nm

Column: Chiracel OD

Eluent: *n*-Hexane/2-Propanol/Acetonitrile = 40/1/1

Rate: 1mL/min

Racemic Product


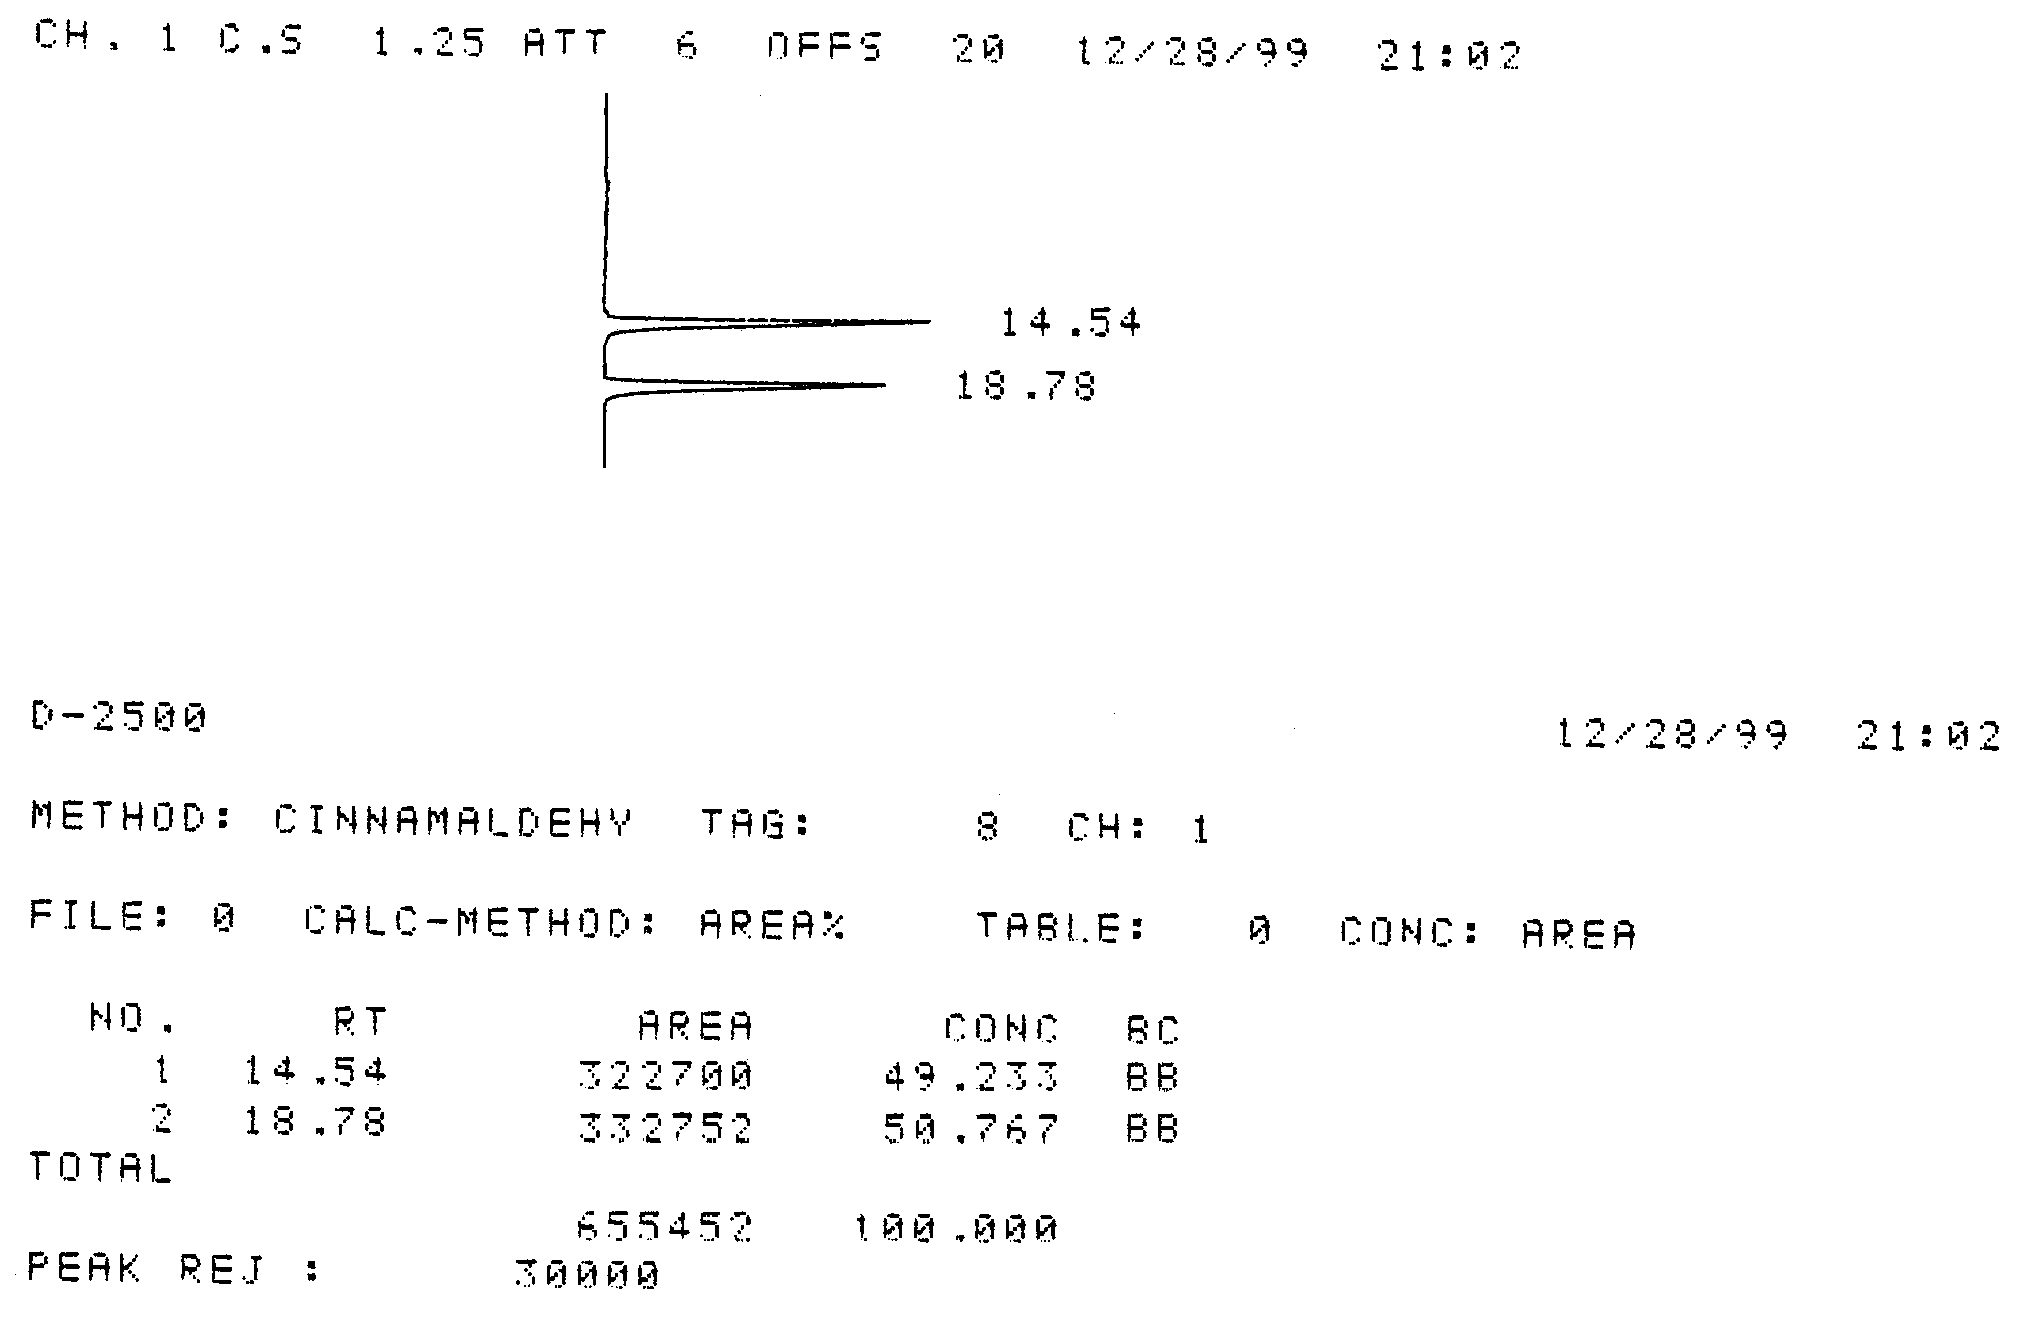


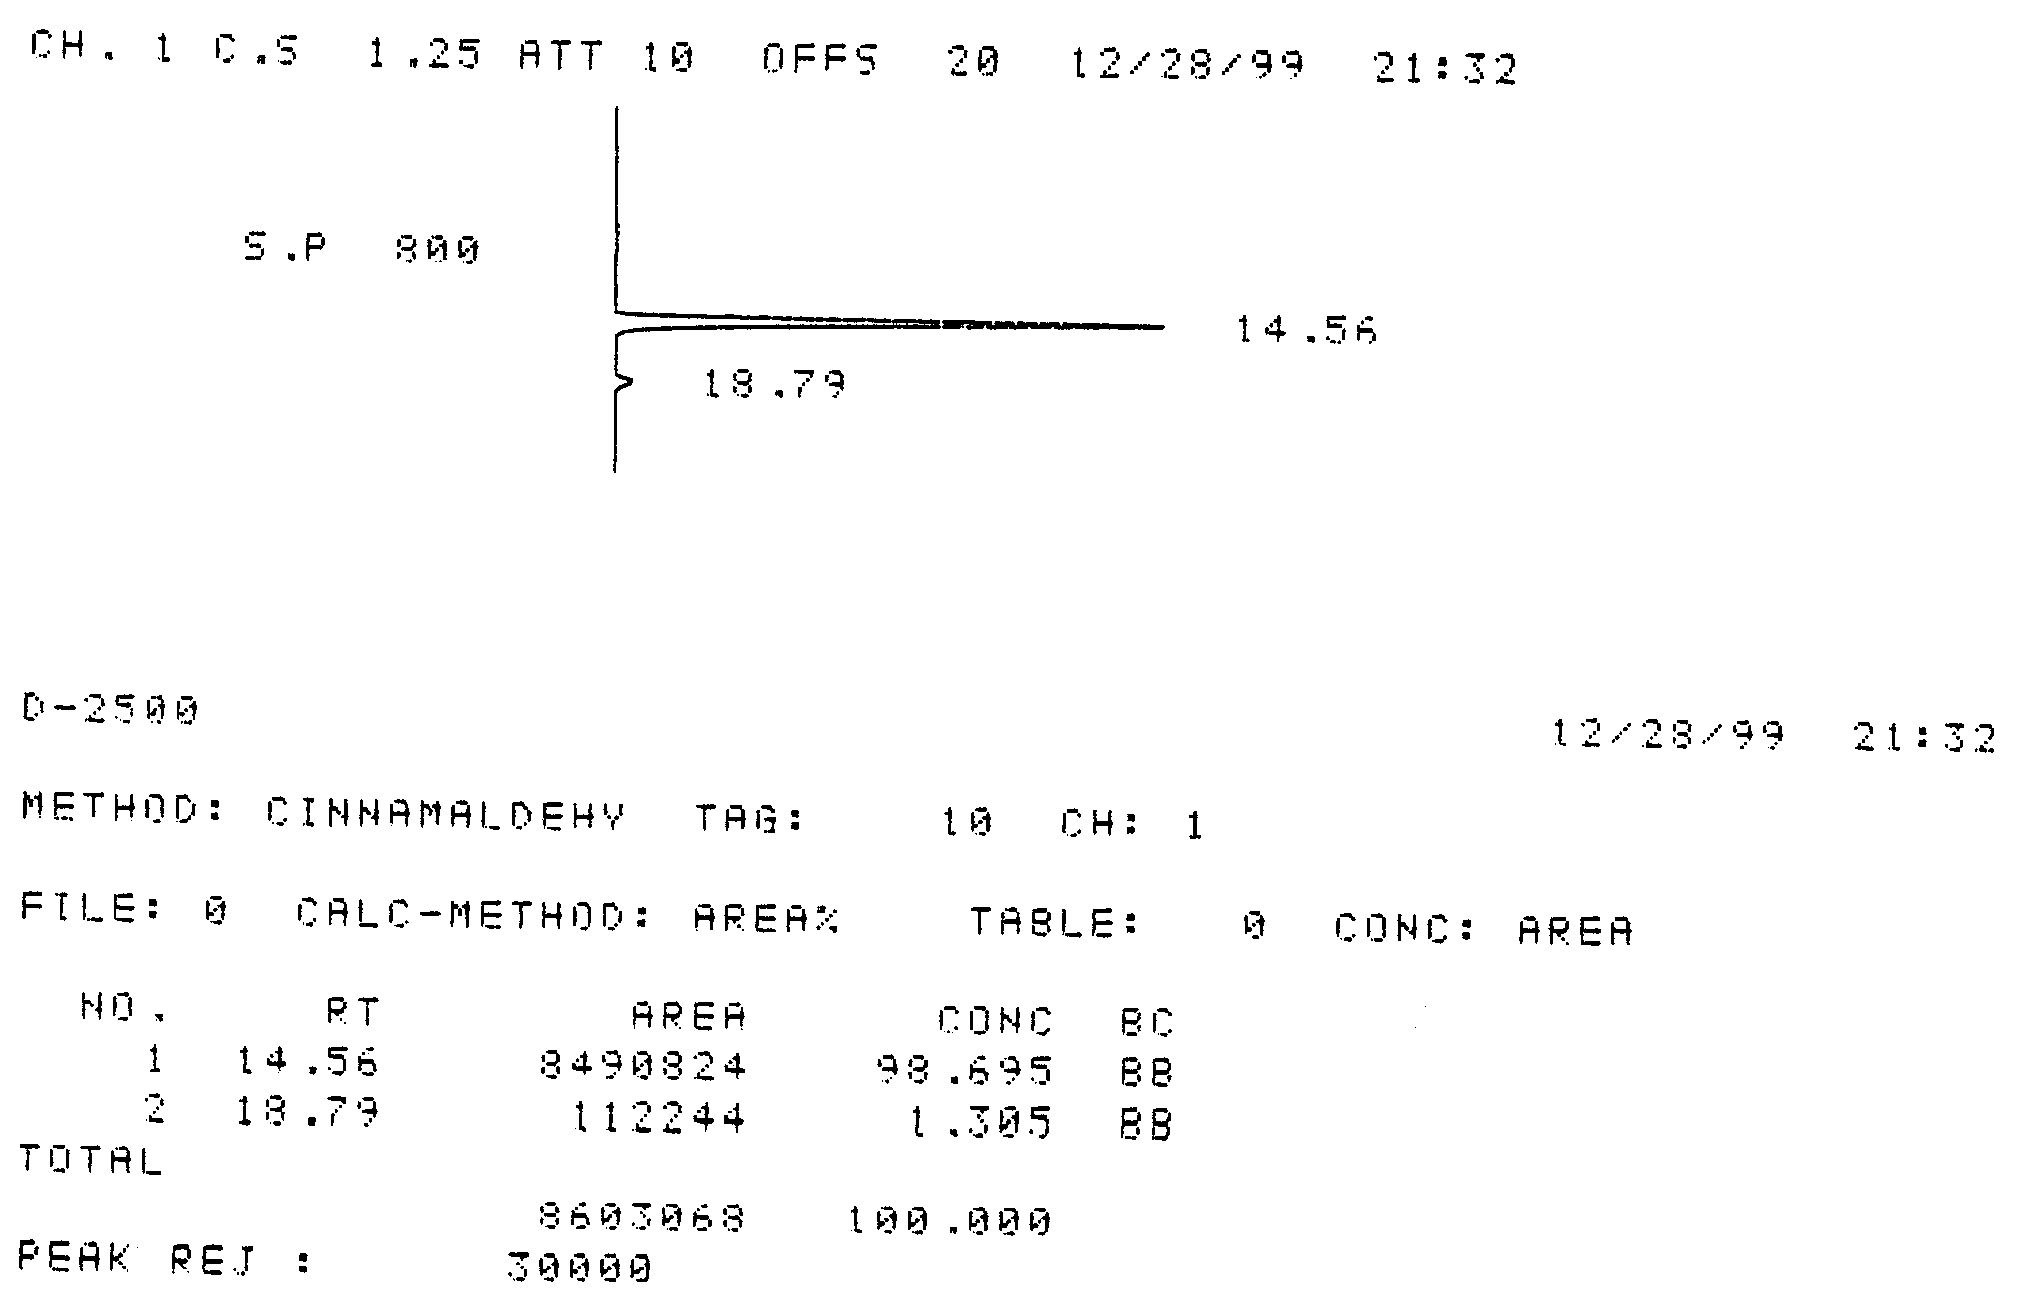


Reaction Product

Detector: UV, 254nm

Column: Chiracel OD

Eluent: *n*-Hexane/2-Propanol/Acetonitrile = 40/1/1

Rate: 1mL/min

Racemic Product


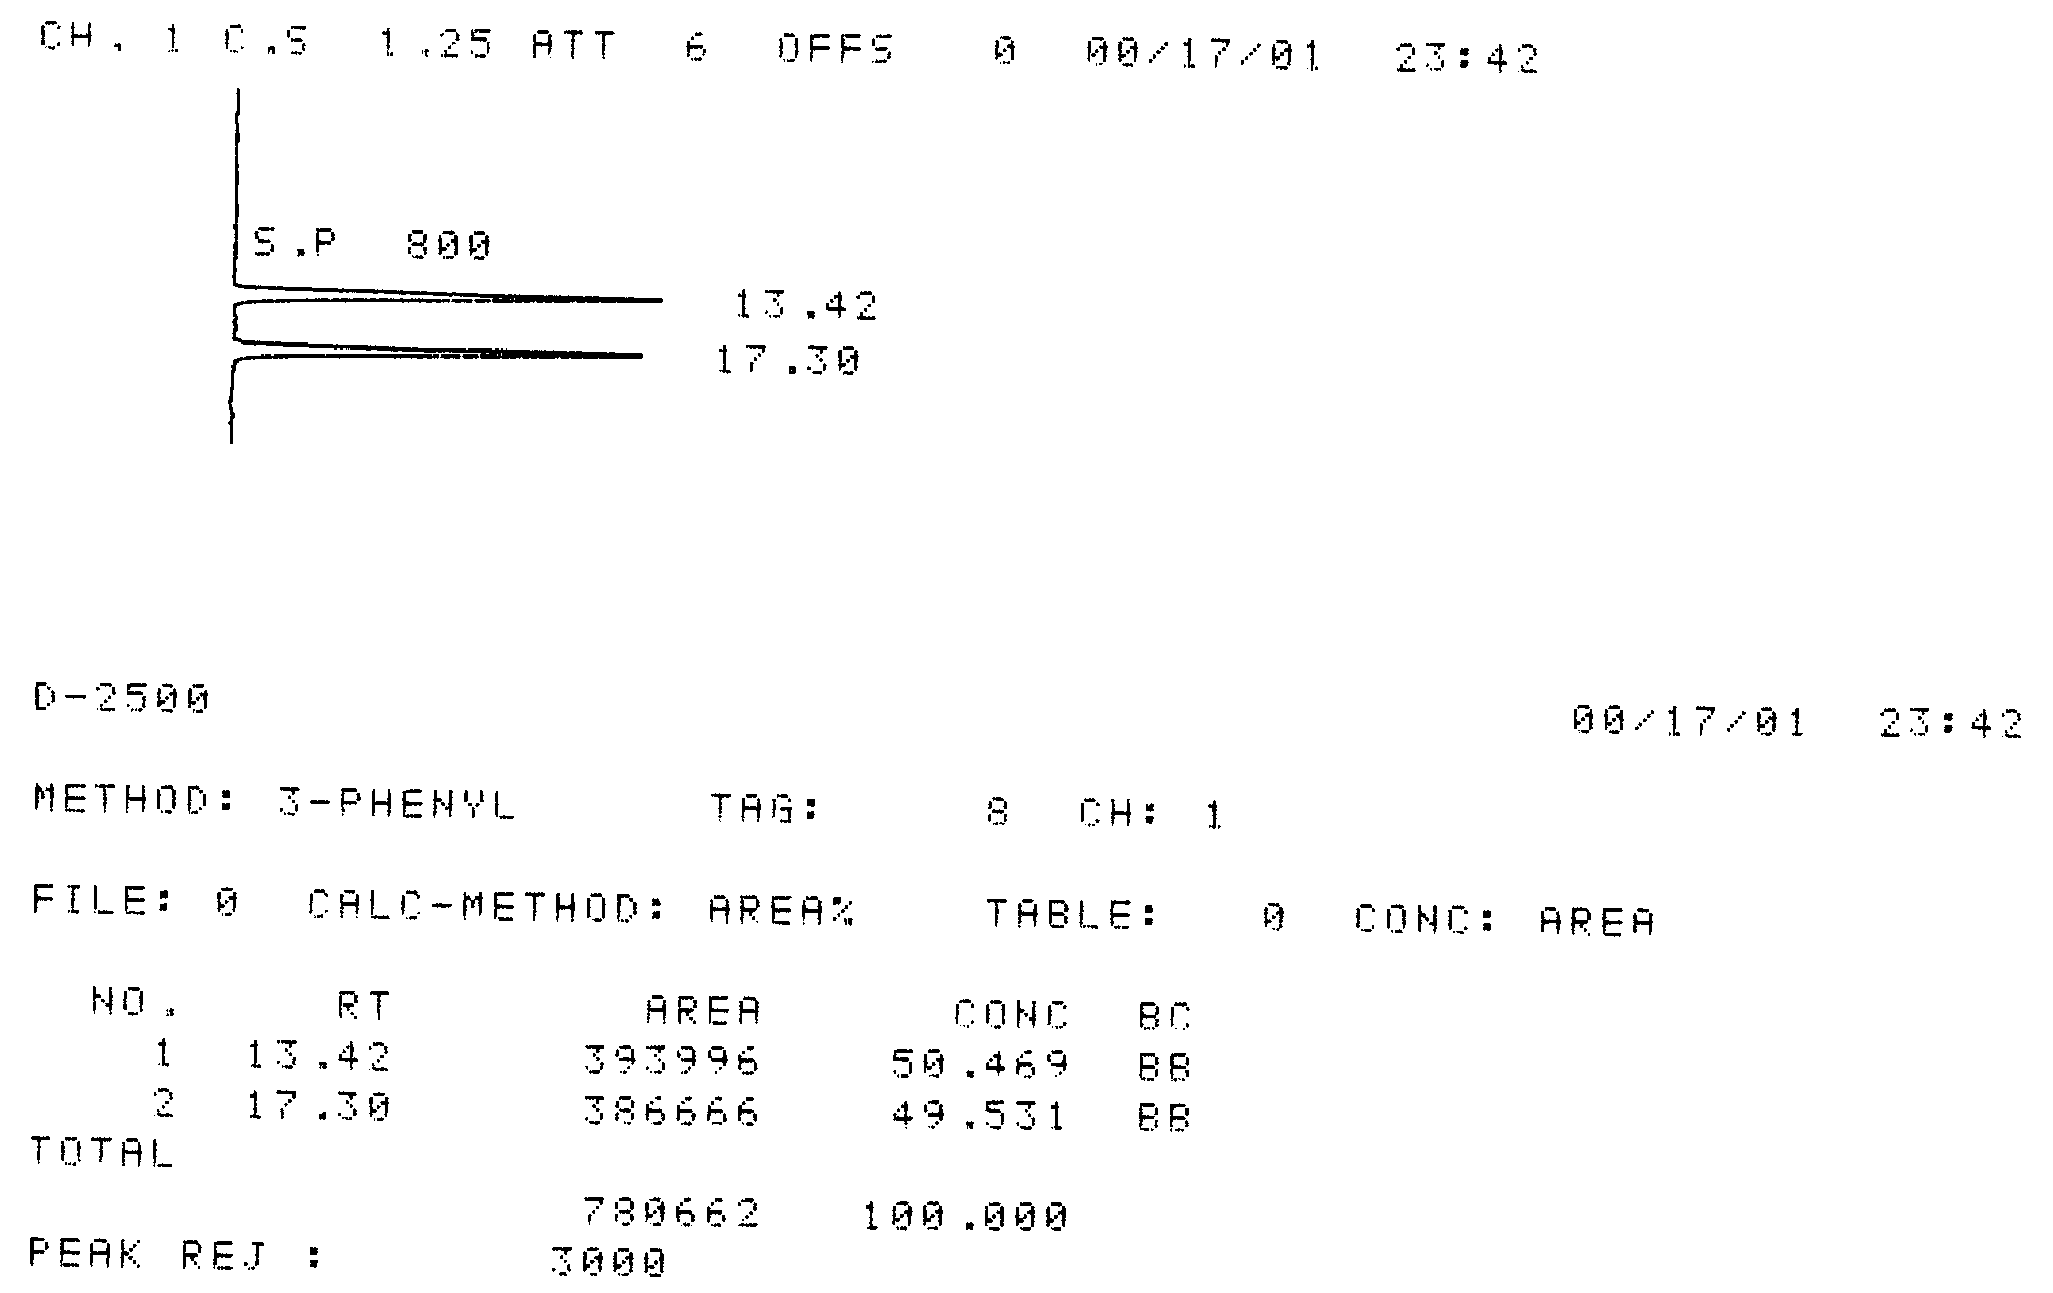


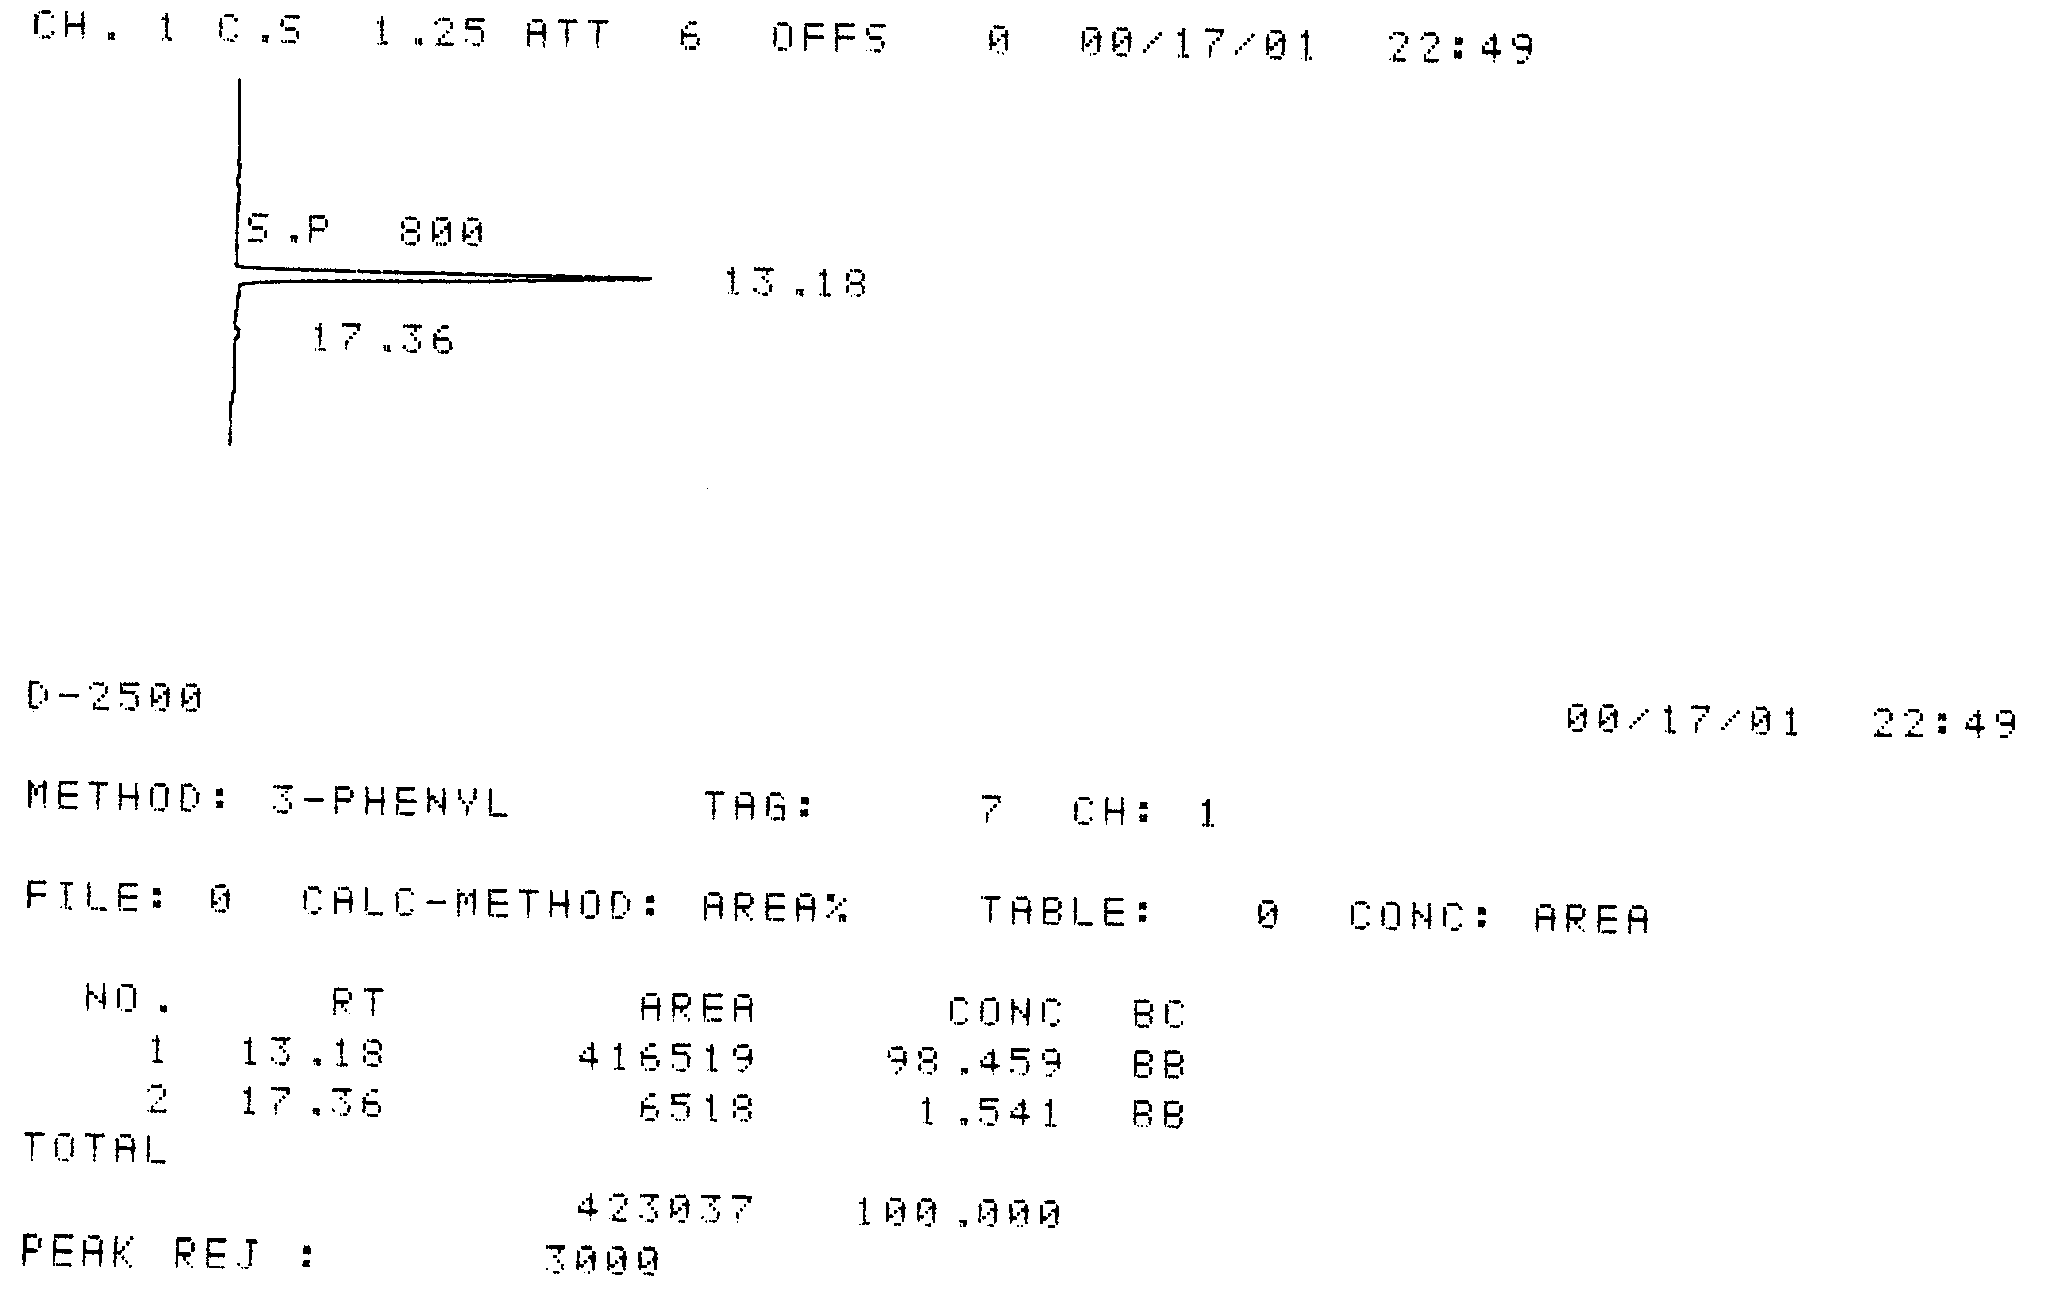


Reaction Product

Detector: UV, 254nm

Column: Chiracel OD

Eluent: *n*-Hexane/2-Propanol/acetonitrile = 40/1/1

Rate: 1mL/min
